# Supplementary material
Source: PubMed Central journal article supplement (PMC8204218)
Supplement: mmc1.pdf [file mmc1.pdf]

**Biophysical Journal, Volume 120**

**Supplemental information**

**Agonist efficiency from concentration-response curves: Structural implications and applications**

**Dinesh C. Indurthi and Anthony Auerbach**

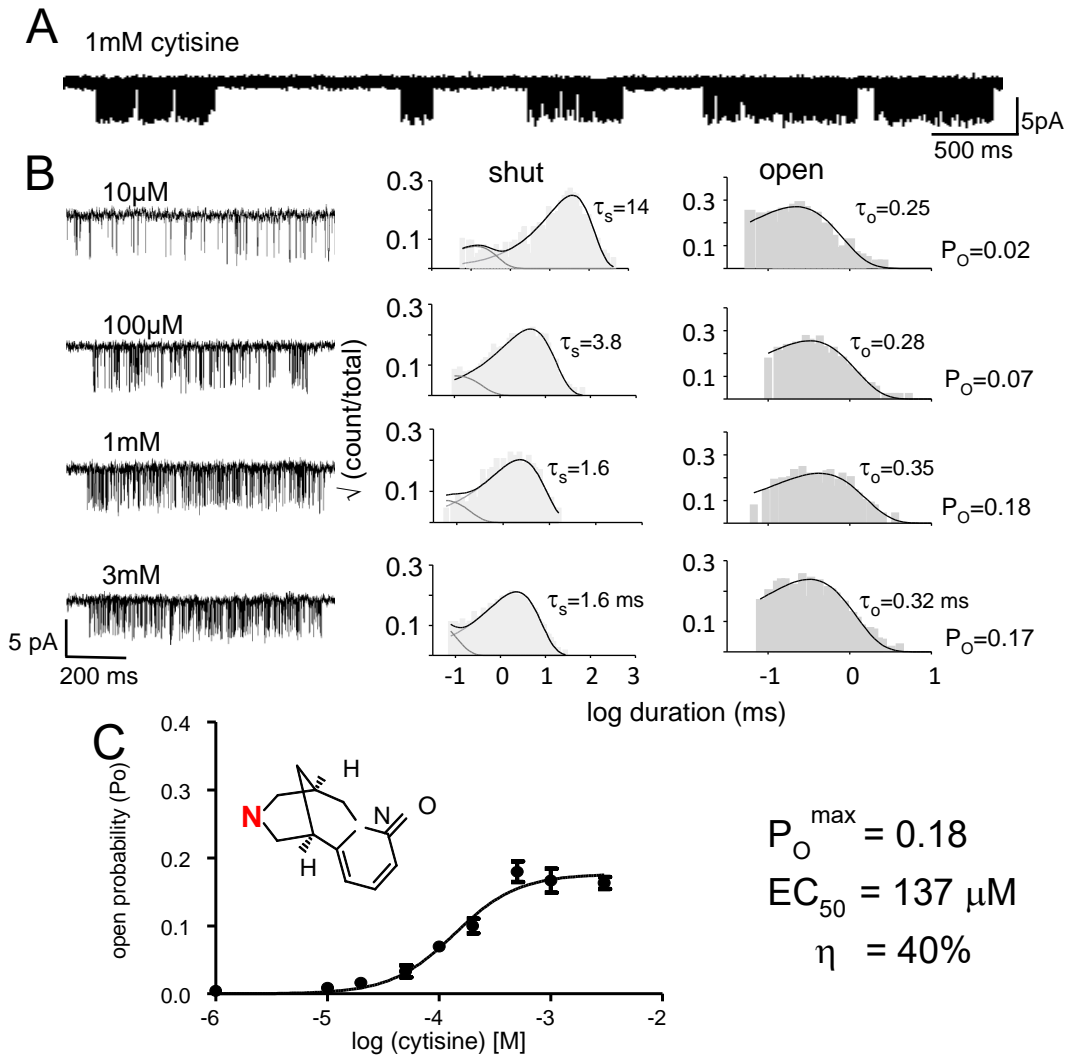

**Figure S1.** Constructing a CRC from single-channel currents (agonist, cytosine). A. Low-resolution view of cell-attached, single-channel currents showing clusters of openings and closing arising from a single AChR separated by long silent periods in which all AChRs in the patch are desensitized (open down). B. High-resolution views of example clusters at different cytosine concentrations and corresponding intra-cluster interval-duration histograms. The predominant shut and open interval durations ( $\tau_s$  and  $\tau_o$ ) were used to calculate an open-channel probability ( $P_o$ ) at each agonist concentration. C. CRC fitted by Eq. 1 to estimate  $EC_{50}$  and  $P_o^{\max}$  (symbols, mean $\pm$ s.e.m.). Efficiency ( $\eta$ ) was calculated by using Eqs. 2-5.

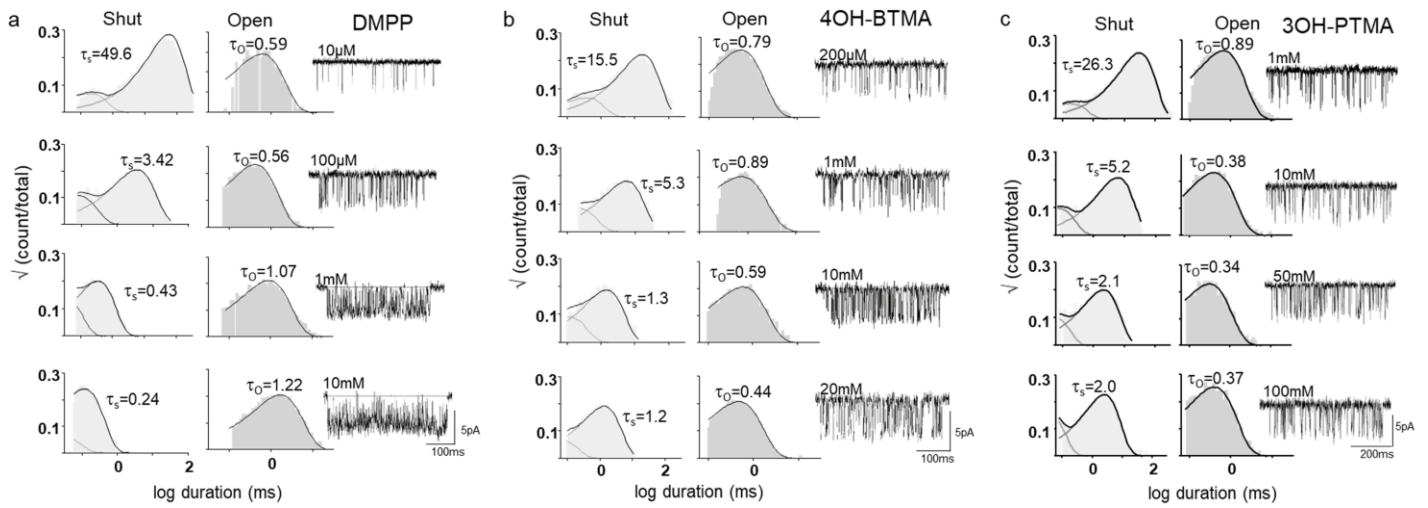

**Figure S2.** Activation of adult-type AChRs by agonists (open in down). Agonist abbreviations in Materials and Methods. Interval-duration histograms and an example cluster. The predominant intra-cluster shut and open interval durations ( $\tau_s$  and  $\tau_o$ ) are in ms. CRCs are shown in Fig. 4A.

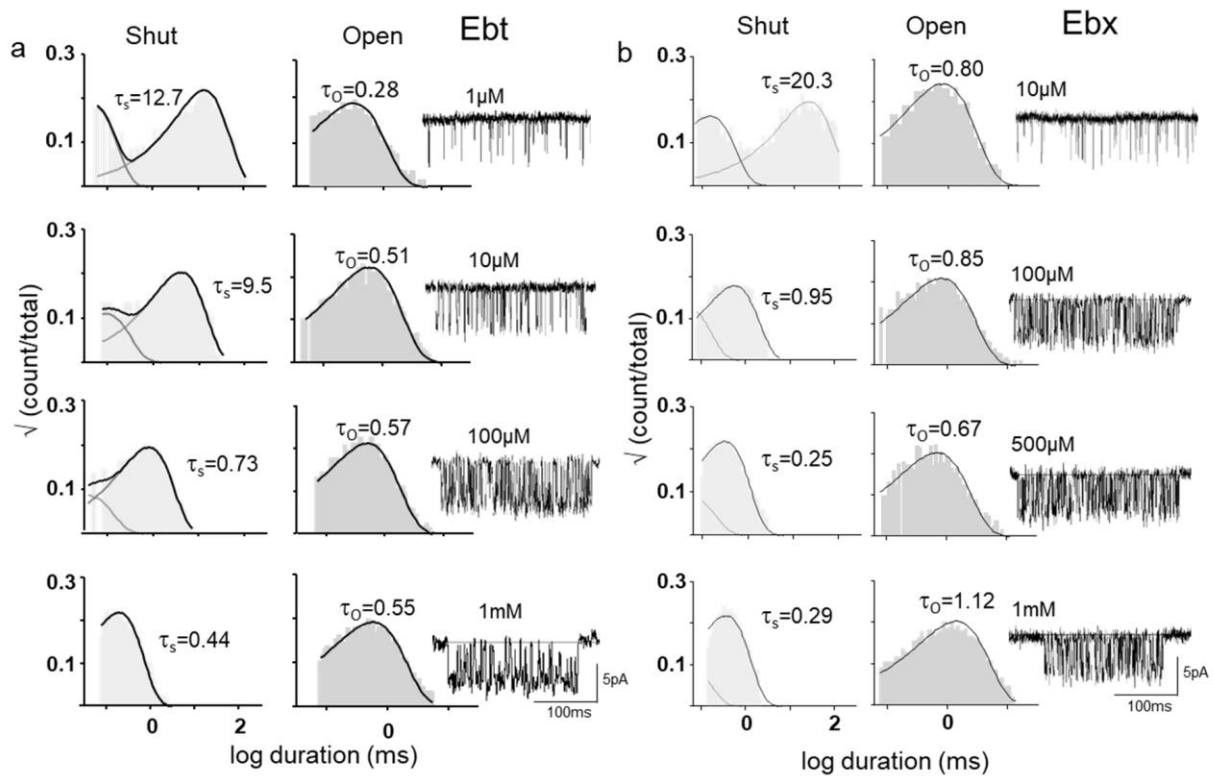

**Figure S3.** Activation of adult-type AChR in the presence of Ebt (epibatidine) and Ebx (epiboxidine). Time constants are ms. CRCs are shown in Fig. 4B.

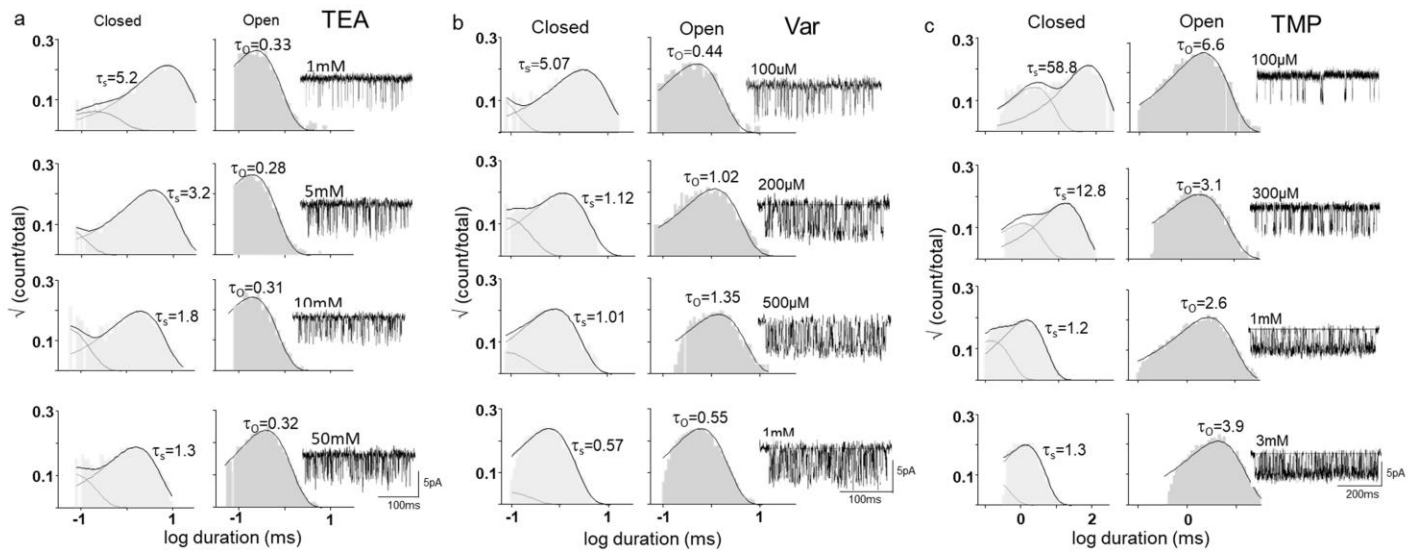

**Figure S4.** Activation of adult-type AChR by TEA (tetraethylammonium), Var (varenicline) and TMP (tetramethylphosphonium). Time constants are ms. CRCs are shown in Fig. 4C.

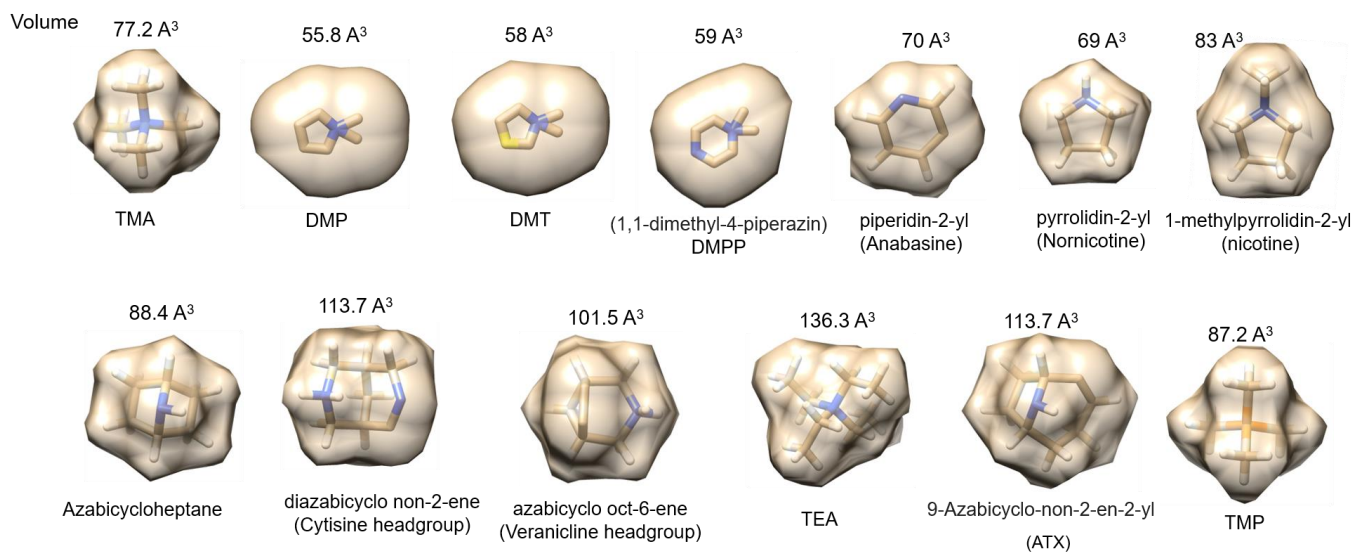

**Figure S5.** Agonist head-group volume. Not shown: the head-groups of ACh, CCh, choline, 3OH-P and 4OH-B are the same as TMA, and those of Ebt and Ebx are the same as azabicycloheptane.

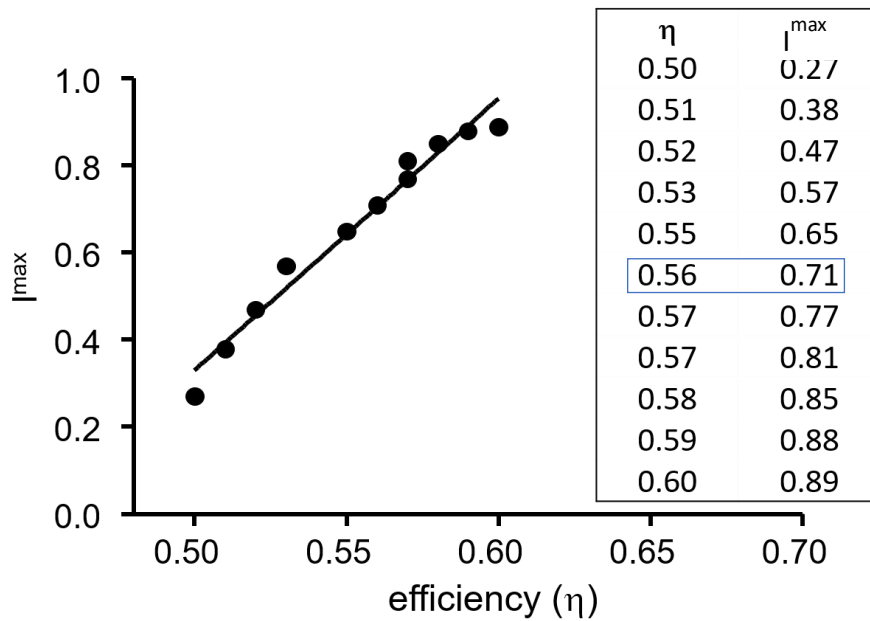

**Figure S6.** Using efficiency ( $\eta$ ) to calculate  $I_{\max}$  from  $EC_{50}$  (from whole cell CRCs normalized to a maximum of 1; Table 2, right) (see Fig. 8B). Agonist, TMA; experimental  $EC_{50}$ , 1.3 mM;  $E_0=5.2 \times 10^{-7}$ . From non-normalized CRCs, the true  $I_{\max}= 0.70$  (Table 2, left).  $I_{\max}$  calculated by using Eq. 9 is very sensitive to  $\eta$ , making it possible to estimate an agonist's efficiency by matching its calculated and experimental (non-normalized) efficacies.

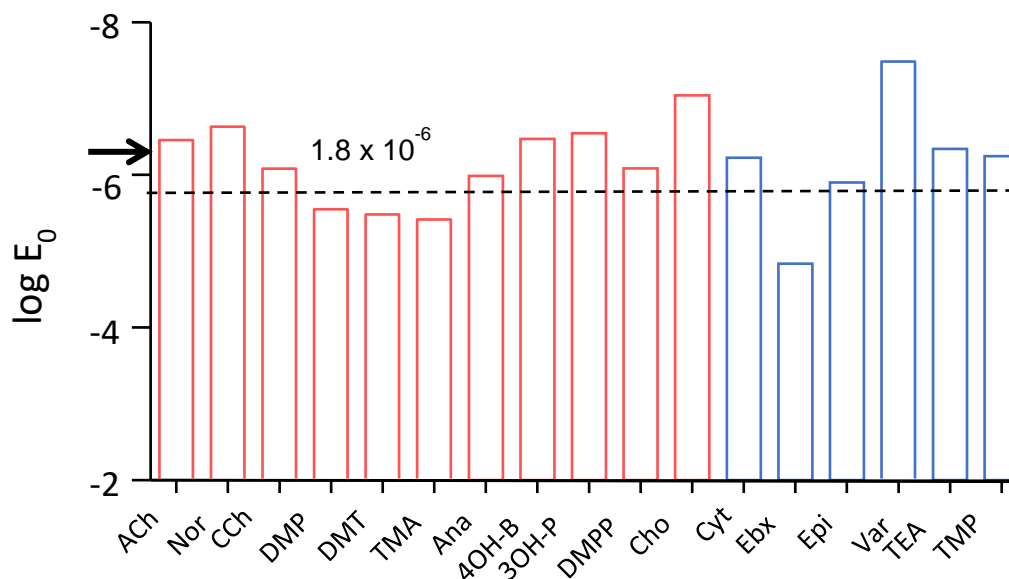

**Figure S7.** Unliganded gating equilibrium constant ( $E_0$ ) estimated from CRC parameters. The assumed  $\eta$  values were either 52% (red) or 41% (blue). The calculated mean  $E_0$  of  $1.8 \times 10^{-6}$  (dashed line) is approximately the same regardless of  $\eta$  and reasonably close to the  $E_0$  value estimated by using other methods,  $7.4 \times 10^{-7}$  (arrow).



**Table S1. ACh efficiency after mutation of a binding site residue (aromatics and  $\epsilon$ P121).**

|                  | $K_{dC}$<br>(mM) | $K_{dO}$<br>( $\mu$ M) | log $K_{dC}$ | log $K_{dO}$ | $\eta$ |
|------------------|------------------|------------------------|--------------|--------------|--------|
| WT               | 0.166            | 0.028                  | -3.78        | -7.55        | 0.50   |
| $\alpha$ Y93W    | 2.01             | 1.20                   | -2.70        | -5.92        | 0.54   |
| H                | 3.20             | 2.90                   | -2.49        | -5.54        | 0.55   |
| A                | 1.21             | 1.30                   | -2.92        | -5.89        | 0.50   |
| F                | 2.59             | 5.80                   | -2.59        | -5.24        | 0.51   |
| S                | 6.24             | 14.0                   | -2.20        | -4.85        | 0.55   |
| $\alpha$ W149Y   | 2.41             | 3.00                   | -2.62        | -5.52        | 0.53   |
| F                | 12.8             | 19.0                   | -1.89        | -4.72        | 0.60   |
| A                | 28.8             | 260.0                  | -1.54        | -3.59        | 0.57   |
| $\alpha$ Y190F   | 3.60             | 16.0                   | -2.44        | -4.80        | 0.49   |
| W                | 6.46             | 56.0                   | -2.19        | -4.25        | 0.48   |
| A                | 16.5             | 1900                   | -1.78        | -2.72        | 0.35   |
| $\alpha$ Y198F   | 0.23             | 0.053                  | -3.64        | -7.28        | 0.50   |
| H                | 5.70             | 9.10                   | -2.24        | -5.04        | 0.55   |
| W                | 0.61             | 0.88                   | -3.21        | -6.06        | 0.47   |
| S                | 3.90             | 12.0                   | -2.41        | -4.92        | 0.51   |
| T                | 9.20             | 38.0                   | -2.04        | -4.42        | 0.54   |
| L                | 4.10             | 21.0                   | -2.39        | -4.68        | 0.49   |
| A                | 7.50             | 41.0                   | -2.12        | -4.39        | 0.52   |
| $\epsilon$ P121L | 0.72             | 2.20                   | -3.14        | -5.66        | 0.44   |
| Y                | 1.27             | 3.00                   | -2.90        | -5.52        | 0.48   |
| G                | 1.00             | 1.20                   | -3.00        | -5.92        | 0.49   |

Equilibrium dissociation constants ( $K_d$ ) of ACh to resting (C) and active (O) conformations of the binding site (Fig. 1) estimated by kinetic modeling (1). Efficiency ( $\eta$ ) is  $1 - \log K_{dC} / \log K_{dO}$ .

**Table S2. Efficiency after mutation os  $\alpha$ G153.**

|               | <b>Ligand</b> | <b>E<sub>2</sub></b> | <b>E<sub>0</sub></b> | <b>K<sub>dC</sub></b> | <b>K<sub>dO</sub></b> | <b>log K<sub>dC</sub></b> | <b>log K<sub>dO</sub></b> | <b><math>\eta</math></b> |
|---------------|---------------|----------------------|----------------------|-----------------------|-----------------------|---------------------------|---------------------------|--------------------------|
| $\alpha$ G153 | Cho           | 0.05                 | 7.4E-07              | 4.0E-03               | 1.5E-05               | -2.40                     | -4.81                     | <b>0.50</b>              |
| S             | Cho           | 0.63                 | 1.9E-05              | 3.7E-04               | 2.0E-06               | -3.43                     | -5.69                     | <b>0.40</b>              |
| A             | Cho           | 1.18                 | 4.2E-05              | 2.9E-04               | 1.7E-06               | -3.54                     | -5.77                     | <b>0.39</b>              |
| P             | Cho           | 1.1                  | 4.8E-05              | 1.5E-04               | 1.0E-06               | -3.81                     | -5.99                     | <b>0.36</b>              |
| K             | Cho           | 3                    | 1.4E-04              | 2.6E-04               | 1.8E-06               | -3.59                     | -5.75                     | <b>0.38</b>              |
| $\alpha$ G153 | DMP           | 0.4                  | 7.4E-07              | 2.1E-03               | 2.9E-06               | -2.68                     | -5.54                     | <b>0.52</b>              |
| S             | DMP           | 6.14                 | 1.9E-05              | 1.8E-04               | 3.2E-07               | -3.74                     | -6.50                     | <b>0.42</b>              |
| A             | DMP           | 12.2                 | 4.2E-05              | 1.9E-04               | 3.6E-07               | -3.71                     | -6.44                     | <b>0.42</b>              |
| P             | DMP           | 13.8                 | 4.8E-05              | 2.0E-04               | 3.8E-07               | -3.69                     | -6.42                     | <b>0.43</b>              |
| K             | DMP           | 20.6                 | 1.4E-04              | 2.3E-04               | 5.9E-07               | -3.64                     | -6.23                     | <b>0.41</b>              |
| $\alpha$ G153 | TMA           | 2.5                  | 7.4E-07              | 8.1E-04               | 4.4E-07               | -3.09                     | -6.36                     | <b>0.51</b>              |
| S             | TMA           | 25.8                 | 1.9E-05              | 8.1E-05               | 7.0E-08               | -4.09                     | -7.16                     | <b>0.43</b>              |
| A             | TMA           | 285                  | 4.2E-05              | 3.9E-05               | 1.5E-08               | -4.41                     | -7.82                     | <b>0.44</b>              |
| P             | TMA           | 179                  | 4.8E-05              | 1.0E-04               | 5.2E-08               | -4.00                     | -7.29                     | <b>0.45</b>              |
| K             | TMA           | 627                  | 1.4E-04              | 1.7E-05               | 8.1E-09               | -4.76                     | -8.09                     | <b>0.41</b>              |
| $\alpha$ G153 | Nicotine      | 0.87                 | 7.4E-07              | 1.0E-03               | 9.2E-07               | -3.00                     | -6.04                     | <b>0.50</b>              |
| S             | Nicotine      | 12.34                | 1.9E-05              | 9.2E-05               | 1.1E-07               | -4.04                     | -6.94                     | <b>0.42</b>              |
| A             | Nicotine      | 17.7                 | 4.2E-05              | 1.1E-04               | 1.8E-07               | -3.94                     | -6.76                     | <b>0.42</b>              |
| P             | Nicotine      | 12.5                 | 4.8E-05              | 3.8E-05               | 7.4E-08               | -4.42                     | -7.13                     | <b>0.38</b>              |
| K             | Nicotine      | 549                  | 1.4E-04              | 1.2E-07               | 6.1E-11               | -6.92                     | -10.22                    | <b>0.32</b>              |
| E             | Nicotine      | 32.05                | 4.5E-05              | 2.6E-05               | 4.0E-09               | -4.59                     | -8.40                     | <b>0.45</b>              |
| R             | Nicotine      | 23.64                | 3.8E-05              | 3.2E-05               | 5.7E-09               | -4.49                     | -8.25                     | <b>0.45</b>              |

Equilibrium dissociation constants ( $K_d$ ) of 4 agonists to resting (C) and active (O) conformations (Fig. 1) estimated by kinetic modeling (2). Efficiency ( $\eta$ ) is  $1 - \log K_{dC} / \log K_{dO}$ .

**Table S3. EC<sub>50</sub> from efficacy given  $\eta$  and E<sub>0</sub> for analogues of choline.**

| Input values          |                |        |                | Calculated values             |                    |                    |                                       |                         |                          |
|-----------------------|----------------|--------|----------------|-------------------------------|--------------------|--------------------|---------------------------------------|-------------------------|--------------------------|
| Ligand                | E <sub>2</sub> | $\eta$ | E <sub>0</sub> | P <sub>0</sub> <sup>max</sup> | log E <sub>0</sub> | log E <sub>2</sub> | log E <sub>2</sub> -logE <sub>0</sub> | K <sub>dC</sub><br>(mM) | EC <sub>50</sub><br>(mM) |
| TMA                   | 2.54           | 0.52   | 5.2E-7         | 0.72                          | -6.28              | 0.40               | 6.69                                  | 0.82                    | 0.49                     |
| ETMA                  | 0.25           | 0.52   | 5.2E-7         | 0.20                          | -6.28              | -0.60              | 5.68                                  | 2.39                    | 2.86                     |
| PTMA                  | 0.29           | 0.52   | 5.2E-7         | 0.22                          | -6.28              | -0.54              | 5.75                                  | 2.61                    | 2.61                     |
| BTMA                  | 2.44           | 0.52   | 5.2E-7         | 0.71                          | -6.28              | 0.39               | 6.67                                  | 0.83                    | 0.51                     |
| Cho                   | 0.05           | 0.52   | 5.2E-7         | 0.05                          | -6.28              | -1.30              | 4.98                                  | 5.01                    | 6.84                     |
| 3OH-PT                | 0.15           | 0.52   | 5.2E-7         | 0.13                          | -6.28              | -0.82              | 5.46                                  | 3.02                    | 3.85                     |
| 4OH-B                 | 0.71           | 0.52   | 5.2E-7         | 0.42                          | -6.28              | -0.15              | 6.14                                  | 1.47                    | 1.42                     |
| Cl Cho                | 0.19           | 0.52   | 5.2E-7         | 0.16                          | -6.28              | -0.72              | 5.56                                  | 2.71                    | 3.37                     |
| 2OH-P                 | 0.02           | 0.52   | 5.2E-7         | 0.02                          | -6.28              | -1.70              | 4.59                                  | 7.65                    | 10.7                     |
| Cholamine<br>(pH 9.0) | 0.04           | 0.52   | 5.2E-7         | 0.04                          | -6.28              | -1.40              | 4.89                                  | 5.56                    | 7.63                     |

Using  $\eta$  and E<sub>0</sub> to calculate EC<sub>50</sub> and K<sub>dC</sub> (Eq. 7) from E<sub>2</sub> (3). TMA (tetramethyl ammonium), ETMA (ethyltrimethyl ammonium), PTMA (propyltrimethyl ammonium), BTMA (butyltrimethyl ammonium), Cho (choline), 3OH-PTMA (3-hydroxypropyl trimethyl ammonium), 4OH-BTMA (4-hydroxybutyl trimethyl ammonium), Cl Cho (2-chloroethyl trimethyl ammonium), 2OH-PTMA (2-hydroxypropyl trimethyl ammonium), cholamine (2-aminoethyl trimethyl ammonium).

## References:

1. Purohit P, Bruhova I, Gupta S, Auerbach A. Catch-and-Hold Activation of Muscle Acetylcholine Receptors Having Transmitter Binding Site Mutations. *Biophysical Journal*. 2014;107(1):88-99.
2. Jadey S, Purohit P, Auerbach A. Action of nicotine and analogs on acetylcholine receptors having mutations of transmitter-binding site residue alphaG153. *J Gen Physiol*. 2013;141(1):95-104.
3. Bruhova I, Auerbach A. Molecular recognition at cholinergic synapses: acetylcholine versus choline. *J Physiol*. 2017;595(4):1253-61.
