# Supplementary material
Source: PubMed Central journal article supplement (PMC8204218)
Supplement: mmc2.pdf [file mmc2.pdf]

# Agonist efficiency from concentration-response curves: Structural implications and applications

Dinesh C. Indurthi<sup>1</sup> and Anthony Auerbach<sup>1,\*</sup>

<sup>1</sup>Department of Physiology and Biophysics, State University of New York at Buffalo, Buffalo, New York

**ABSTRACT** Agonists are evaluated by a concentration-response curve (CRC), with a midpoint ( $EC_{50}$ ) that indicates potency, a high-concentration asymptote that indicates efficacy, and a low-concentration asymptote that indicates constitutive activity. A third agonist attribute, efficiency ( $\eta$ ), is the fraction of binding energy that is applied to the conformational change that activates the receptor. We show that  $\eta$  can be calculated from  $EC_{50}$  and the asymptotes of a CRC derived from either single-channel or whole-cell responses. For 20 agonists of skeletal muscle nicotinic receptors, the distribution of  $\eta$ -values is bimodal with population means at 51% (including acetylcholine, normicotine, and dimethylphenylpiperazinium) and 40% (including epibatidine, varenicline, and cytisine). The value of  $\eta$  is related inversely to the size of the agonist's headgroup, with high- versus low-efficiency ligands having an average volume of 70 vs. 102 Å<sup>3</sup>. Most binding site mutations have only a small effect on acetylcholine efficiency, except for  $\alpha$ Y190A (35%),  $\alpha$ W149A (60%), and those at  $\alpha$ G153 (42%). If  $\eta$  is known, the  $EC_{50}$  and high-concentration asymptote can be calculated from each other. Hence, an entire CRC can be estimated from the response to a single agonist concentration, and efficacy can be estimated from  $EC_{50}$  of a CRC that has been normalized to 1. Given  $\eta$ , the level of constitutive activity can be estimated from a single CRC.

**SIGNIFICANCE** Receptors are molecular machines that convert chemical energy from agonist binding into mechanical energy of a global conformational change that generates a cell response. Agonists are distinguished by their potency (proportional to affinity) and efficacy but also by the efficiency at which their binding energy is applied to receptor activation. Here, we show that agonist efficiency can be estimated from a single concentration-response curve (CRC) and estimate efficiencies of 20 nicotinic receptor agonists. These have a bimodal distribution with larger agonists belonging to the lower efficiency population. We further show that mutations of some binding site residues alter efficiency and that knowledge of agonist efficiency simplifies and extends dose-response curve analysis.

## INTRODUCTION

Nicotinic acetylcholine (ACh) receptors (AChRs) are members of the cys-loop, ligand-gated receptor family that in mammals also comprise GABA<sub>A</sub>, glycine, 5-HT<sub>3</sub>, and zinc-activated receptors (1). They are 5-subunit, liganded-gated ion channels with agonist binding sites in the extracellular domain, far from a narrow region of the pore in the transmembrane domain that regulates ion conductance (2,3).

AChRs switch between global closed-channel (C) and open-channel (O) conformations (“gating”) to produce transient membrane currents. Agonists promote channel opening because they bind more strongly to the O conformation. Importantly, the energy (structure) of the binding site at the

gating transition state resembles that of O (4). Hence, when a receptor begins its journey from C to O, extra (favorable) binding energy eases the pathway, thereby increasing the probability of reaching and residing in O (P<sub>O</sub>) (5,6).

AChRs are the primary receptors at vertebrate neuromuscular synapses, where they initiate muscle membrane depolarization and contraction. Neuromuscular AChRs have two  $\alpha$ 1 subunits and one each of  $\beta$ ,  $\delta$ , and either  $\epsilon$  (adult) or  $\gamma$  (fetal). There are two neurotransmitter binding sites located at  $\alpha$ 1- $\delta$  and  $\alpha$ 1- $\delta/\gamma$  subunit interfaces (7) that are approximately equivalent for ACh in adult-type AChRs (5). AChRs switch conformation spontaneously (only under the influence of temperature), with the presence of neurotransmitters at both adult sites increasing the opening rate constant by a factor of  $\sim$ 5 million and the lifetime of the O conformation by a factor of  $\sim$ 5.

Agonists are typically characterized by a potency (proportional to affinity) and an efficacy. Affinity is a measure of how strongly the ligand binds to its target site and is the inverse of an equilibrium dissociation constant. The constants

Submitted December 2, 2020, and accepted for publication February 24, 2021.

\*Correspondence: [auerbach@buffalo.edu](mailto:auerbach@buffalo.edu)

Editor: Vasanthi Jayaraman.

<https://doi.org/10.1016/j.bpj.2021.02.034>

© 2021 Biophysical Society.

$K_{dC}$  and  $K_{dO}$  correspond to low-affinity (weak) binding to the C conformation and high-affinity (strong) binding to the O conformation. (The logarithm of an equilibrium dissociation constant is proportional to binding energy.)

The high-concentration asymptote of a CRC, or the maximal response elicited by the ligand, is called  $P_O^{\max}$  in single-channel or  $I^{\max}$  in whole-cell currents. This limit gives the agonist's efficacy and depends only on the fully liganded gating equilibrium constant. The midpoint ( $EC_{50}$ ) of a CRC or the agonist concentration that produces a half-maximal response is proportional to  $K_{dC}$  but also depends on the gating equilibrium constant.

The low-concentration asymptote of a CRC, which gives the level of activity in the absence of agonists ( $P_O^{\min}$  or  $I^{\min}$ ), depends on the unliganded gating equilibrium constant that is typically small and difficult to measure. However, it is important to know the exact value of this constant because it multiplies the fully liganded gating equilibrium constant to influence potency, efficacy, and synaptic current profiles. Allosteric modulators and AChR mutations (8), including some that cause slow-channel myasthenic syndromes (9), alter  $EC_{50}$ ,  $I^{\max}$ , and the time course of synaptic currents simply by increasing or decreasing the unliganded gating equilibrium constant, without making a noticeable change in baseline activity.

Recently, efficiency ( $\eta$ ) was defined as the fraction of an agonist's chemical binding energy that is converted into the mechanical (kinetic) energy for gating (10). Efficiency reports the strength of the link between binding and gating. As shown previously (and again below by using a different approach),  $\eta$  is a function of the resting/active binding energy ratio,  $\log K_{dC}/\log K_{dO}$ . Direct, independent measurements of these two equilibrium dissociation constants obtained by detailed kinetic modeling of single-channel currents indicated that at adult-type human AChR neurotransmitter binding sites, ACh and three related agonists on average apply  $\sim 50\%$  of their binding energy to gating, whereas at the  $\alpha 1\text{-}\delta$  binding site, the frog toxin epibatidine and three related agonists on average apply only  $\sim 40\%$  (10).

Here, we show that agonist efficiency can be estimated from the asymptotes and midpoint of a single CRC constructed from either single-channel or whole-cell responses. Given two agonists with the same  $EC_{50}$ , the one with the larger  $I^{\max}$  has the greater  $\eta$ . We provide separate efficiency estimates for 20 agonists of mouse adult AChRs and show that knowledge of agonist efficiency broadens our understanding of receptor activation and drug action.

## MATERIALS AND METHODS

### Experimental design

#### Expression

Human embryonic kidney 293 cells were maintained in Dulbecco's minimal essential medium supplemented with 10% fetal bovine serum and

1% penicillin-streptomycin (pH 7.4). For single-channel experiments, AChRs were expressed by transient transfection of 3  $\mu\text{g}$  mouse  $\alpha 1$ ,  $\beta$ ,  $\delta$ , and  $\epsilon$  subunits in the ratio 2:1:1:1 (*TransIT* 293 transfection reagent; Mirus Bio, Madison, WI). Electrophysiological experiments started  $\sim 48$  h post-transfection. For whole-cell recording, human embryonic kidney 293 cells were transiently transfected with adult-type mouse AChRs using calcium phosphate precipitation. 20  $\mu\text{g}$  of cDNA was added in the ratio of 2:1:1:1 ( $\alpha 1$ -GFP encoded between M3-M4, $\beta$ , $\delta$  and  $\epsilon$ ) to a T75 flask at  $\sim 60\%$  confluence. Cells were incubated for  $\sim 16$  h at  $37^\circ\text{C}$ , replenished with fresh medium, and harvested after  $\sim 20$  h of washing. GFP-positive cells were sorted by using an ABD FACS Fusion four-laser Cell Sorter (Becton Dickinson, Franklin Lakes, NJ). Cells were excited with laser at 488 nm, and the GFP signal was collected in the green channel through a 530/40 filter. A light scatter gate was drawn in the side scatter versus forward scatter plot to exclude debris and to include viable single cells. No animals were used in this study.

### Electrophysiology

Single-channel currents were recorded in the cell-attached patch configuration at  $23^\circ\text{C}$ . The bath solution was (in mM) 142 KCl, 5.4 NaCl, 1.8  $\text{CaCl}_2$ , 1.7  $\text{MgCl}_2$ , and 10 HEPES/KOH (pH 7.4). Patch pipettes were fabricated from borosilicate glass and fire polished to a resistance of  $\sim 10$  M $\Omega$  when filled with the pipette solution that was Dulbecco's phosphate-buffered saline (in mM): 137 NaCl, 0.9  $\text{CaCl}_2$ , 2.7 KCl, 1.5  $\text{KH}_2\text{PO}_4$ , 0.5  $\text{MgCl}_2$ , and 8.1  $\text{Na}_2\text{HPO}_4$  (pH 7.3/NaOH). Currents were recorded using a PC505 amplifier (Warner Instruments, Hamden, CT), low-pass filtered at 20 kHz, and digitized at a sampling frequency of 50 kHz using a data acquisition board (SCB-68; National Instruments, Austin, TX). Agonists were added to the pipette solution at the desired concentration.

Whole-cell currents were recorded using an IonFlux 16 automated patch-clamp system (Fluxion Biosciences, Alameda, CA) on 96-well IonFlux microfluidic ensemble plates that give a cumulative whole-cell current from up to 20 cells. GFP-positive cells were resuspended in extracellular solution containing (in mM) 138 NaCl, 4 KCl, 1.8  $\text{CaCl}_2$ , 1  $\text{MgCl}_2$ , 5.6 glucose, and 10 HEPES, pH adjusted to 7.4 with NaOH. Cells were captured in the trapping wells with intracellular solution containing 60 KCl, 70 KF, 15 NaCl, 5 HEPES, and 5 EGTA, pH adjusted to 7.2 using KOH. Cells clamped at  $-80$  mV were exposed to a 2-s agonist application followed by 90-s wash between applications to allow recovery from desensitization. IonFlux software (ver.4.5) was used for cell capture, seal formation, compound application, and data acquisition.

### Analysis

Scheme 1 (Fig. 1) shows the main states of AChR activation/deactivation. First, we estimated  $\eta$  from single-channel current CRCs. When agonist binding and channel opening rate constants are sufficiently large, openings occur in clusters (Fig. 2 A; Fig. S1–S4; (11)). Shut intervals within clusters represent mainly agonist binding to C and channel opening (*bold* in Fig. 1), whereas shut intervals between clusters represent mainly long-lived desensitization (not shown in Fig. 1; for connections, see (6)). We selected for analysis clusters that appeared by eye to arise from a homogeneous  $P_O$  population and, to exclude sojourns in desensitized states, limited our analyses to intracluster interval durations.

Because of the high extracellular  $[\text{K}^+]$ , the cell membrane potential ( $V_m$ ) was 0 mV. The AChR agonists we examined also are channel blockers. To both generate measurable currents and reduce the effect of channel block on  $P_O$ , the membrane was depolarized to  $+70$  mV by holding the pipette at  $-70$  mV. This effectively eliminated agonist binding to the channel block site in the transmembrane domain but did not affect agonist binding to the neurotransmitter sites in the extracellular domain.

Analyses of the single-channel (outward) currents were performed by using QUB software (12). A cluster was defined as a group of openings flanked by shut intervals longer than a duration that depended on the agonist concentration (range, 7–20 ms). Open and shut currents within clusters were idealized into noise-free intervals by using the segmental k-means

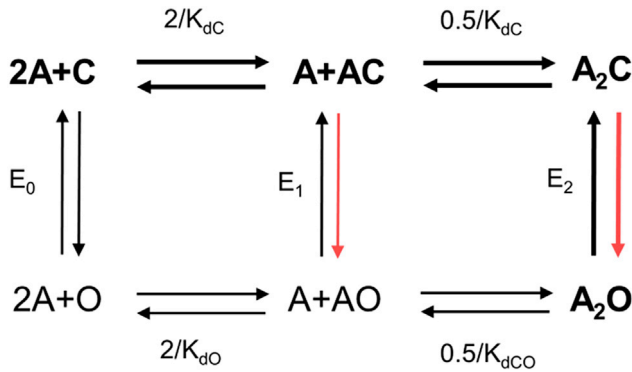

FIGURE 1 Cyclic activation of AChRs (scheme 1). Receptors switch between closed-channel (C) and open-channel (O) conformations spontaneously (influenced only by temperature) with or without agonists (A). Equilibrium constants are as follows:  $E_n$ , gating with  $n$  bound agonists, and  $K_{dC}$  and  $K_{dO}$ , dissociation constants to C (low affinity) and to O (high affinity). The adult-type, endplate AChR binding sites are approximately equivalent and independent with regards to the agonists used in this study. From experiments and microscopic reversibility,  $E_2/E_0 = (K_{dC}/K_{dO})^2$ . Agonists increase activity above the baseline level because they bind more strongly to the C-O transition state, with the extra binding energy serving to increase the channel-opening rate constant (red arrows). Thick arrows and bold letters mark the physiological activation-deactivation pathway. To see this figure in color, go online.

algorithm after digitally low-pass filtering the data at 10 kHz (13). Idealized interval durations were fitted by multiple exponential components using a maximal interval likelihood algorithm (14). Cluster  $P_O$  at each agonist concentration was calculated from the time constants of the predominant components of the shut- ( $\tau_s$ ) and open-time distributions ( $\tau_o$ ):  $\tau_o/(\tau_s + \tau_o)$  (Fig. 2 B). The single-channel CRC was a plot of the absolute  $P_O$  (not normalized) versus the agonist concentration.

We also estimated  $\eta$  from whole-cell current CRCs. The currents were digitized using a sampling frequency of 10 kHz and were analyzed using IonFlux Data Analyzer v5.0. Peak currents were normalized to a maximal response ( $I/I^{\max}$ ), where  $I^{\max}$  was the response to 300  $\mu\text{M}$  ACh. The 20–80% rise time to a step to 300  $\mu\text{M}$  ACh was  $\sim 400$  ms, a time we attribute to solution exchange.

The rate of entering a long-lived desensitized state is proportional to cluster  $P_O$  and occurs with a rate constant of  $\sim 5 \text{ s}^{-1}$  (15). Hence, under conditions in which  $P_O$  is  $\sim 1$ , a whole-cell current will decline with a time constant of  $\sim 200$  ms. As a consequence, the peaks of whole-cell currents elicited by high concentrations of high-efficacy agonists are truncated because of the solution exchange time. This has the effect of shifting  $EC_{50}$  to lower concentrations. Responses at lower agonist concentrations or from lower efficacy agonists were unaffected by desensitization.

### Voltage, $E_0$ , and background mutations

Depolarization to  $V_m = +70$  mV reduces channel block by the agonist but has the undesired consequence of shortening  $\tau_o$  to make single-channel current detection and idealization difficult. To compensate, we added the background mutation  $\epsilon\text{S450W}$  (in the M4 transmembrane segment of the  $\epsilon$  subunit) that has the equal-but-opposite effect on the unliganded gating equilibrium constant  $E_0$  as does depolarization by +140 mV but has no effect on agonist binding (16). With this mutation,  $\tau_o$  and  $E_0$  at +70 mV were the same as in wild-type (wt) adult AChRs at  $V_m = -70$  mV.  $E_0$  at  $-100$  mV is  $7.4 \times 10^{-7}$  and is reduced  $e$ -fold by a 60-mV depolarization (17). Hence, we estimate that in our experiments at  $V_m = +70$  mV and with  $\epsilon\text{S450W}$ ,  $E_0$  was  $5.2 \times 10^{-7}$ . In the whole-cell experiments, no background mutations were used and  $V_m = -80$  mV, so we estimate  $E_0$  was  $5.9 \times 10^{-7}$ .

With the low-efficacy agonists varenicline, tetraethylammonium (TEA), and tetramethylphosphonium (TMP), single-channel clusters generated by wt AChRs were poorly defined because the channel opening rate constant was small. For these ligands,  $P_O$  could not be estimated accurately using wt AChRs. To increase the diliganded opening rate constant and generate better-defined, higher- $P_O$  clusters, we added two background mutations in the  $\epsilon$  subunit,  $\epsilon\text{L269F}$  (in the M2 helix) and  $\epsilon\text{E181W}$  (in strand  $\beta 9$ ), without  $\epsilon\text{S450W}$ . Together, these two substitutions increase  $E_0$  by 1084-fold (making it  $4.9 \times 10^{-4}$ ), without affecting agonist binding (18,19). From the uncorrected CRC, we estimated an  $E_2$  value from the  $P_O^{\max}$  (Eq. 4) and  $K_{dC}$  from  $EC_{50}$ . We divided this  $E_2$  by 1084 to arrive at a corrected  $E_2$ , from which we calculated corrected  $P_O^{\max}$  and  $EC_{50}$  values that pertain to wt AChRs (Table 1).

### Equations

Single-channel CRCs were constructed from  $P_O$  values after eliminating extraneous events arising from channel block, desensitization, and modal activity (23). Whole-cell CRCs were constructed directly from peak currents.  $EC_{50}$  and  $P_O^{\max}$  (or  $I^{\max}$ ) the Hill coefficient ( $n_H$ ) were estimated by fitting the CRC,

$$P_O = \frac{P_O^{\max}}{1 + \left(\frac{EC_{50}}{[agonist]}\right)^{n_H}} \quad (1)$$

Scheme 1 (Fig. 1) was used to derive expressions for  $\eta$ . Because microscopic reversibility is satisfied,

$$\frac{E_2}{E_0} = \left(\frac{K_{dC}}{K_{dO}}\right)^2, \quad (2)$$

where  $E_2$  and  $E_0$  are the diliganded and unliganded gating equilibrium constants, and  $K_{dC}$  and  $K_{dO}$  are the equilibrium dissociation constants for binding to C and O. The exponent reflects the fact that in adult-type AChRs, there are two neurotransmitter sites that are approximately equivalent and independent with regards to the agonists used in this study. Eq. 2 has been confirmed by experiment (5).

Constitutive and monoliganded activity are both rare, so in wt AChRs, the only significant pathway that generates current is the clockwise, linear activation route highlighted in Fig. 1. Transitions between these four states determine  $P_O$  and, hence, the experimental values of  $EC_{50}$  and  $P_O^{\max}$  (or  $I^{\max}$ ).

Accordingly,  $EC_{50}$  depends on both binding and gating equilibrium constants,

$$EC_{50} = \frac{K_{dC}\sqrt{E_2 + 2}}{E_2 + 1}, \quad (3)$$

whereas  $P_O^{\max}$  ( $I^{\max}$ ) depends only on the gating equilibrium constant,

$$P_O^{\max} = \frac{E_2}{E_2 + 1}. \quad (4)$$

This equation also can be used to relate  $P_O^{\min}$  ( $I^{\min}$ ) and  $E_0$ .

Agonist efficacy depends on the diliganded gating equilibrium constant that, from Eq. 2, is a function of the affinity ratio,  $K_{dC}/K_{dO}$ . Taking the log of Eq. 2, we see that efficacy is determined by the difference between the binding energies,  $\log(K_{dC}) - \log(K_{dO})$ . Partial agonists experience smaller increases in O versus C binding energy compared to full agonists, antagonists experience no change in binding energy, and inverse agonists experience a decrease in favorable binding energy upon receptor activation.

In contrast,  $\eta$  depends on the ratio of these binding energies,  $\log(K_{dC})/\log(K_{dO})$ , as shown previously (10) and as follows. Agonist activation of

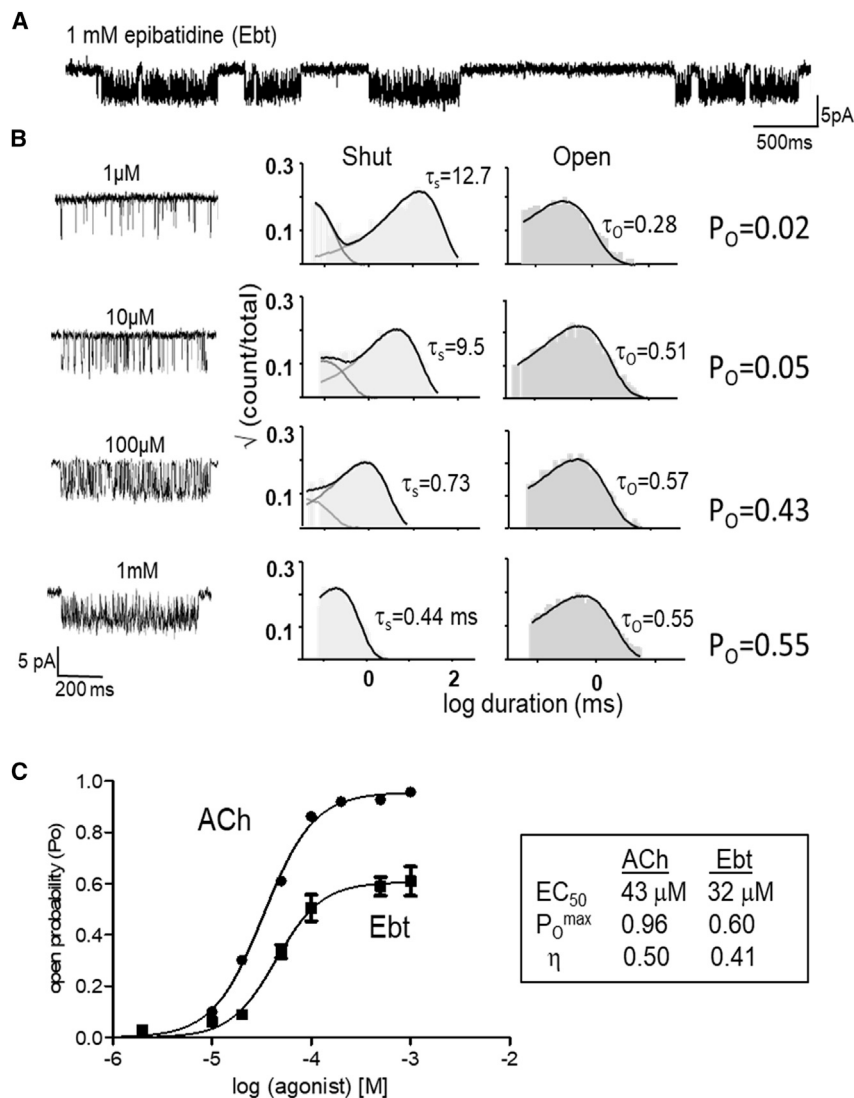

**FIGURE 2** Single-channel current CRCs. (A) Low-resolution view of cell-attached, single-channel currents activated by epibatidine (Ebt; open is down). Clusters of open/shut intervals from one AChR separated by silent periods in which all AChRs in the patch are desensitized. (B) Left, high-resolution views of example clusters at different Ebt concentrations. Right, corresponding intracuster interval-duration histograms are shown.  $\tau_s$  and  $\tau_o$  are predominant shut- and open-interval time constants (in ms).  $P_O$  probability at each agonist concentration is  $\tau_o/(\tau_s + \tau_o)$ . (C) Each CRC was fitted by Eq. 1 to estimate  $EC_{50}$  and  $P_O^{\max}$  (symbols, mean  $\pm$  SE). Efficiency ( $\eta$ ) was calculated by using Eqs. 2–5. It is apparent that ACh is more efficient than Ebt because the same  $EC_{50}$  is associated with a greater  $P_O^{\max}$ .

a resting, unliganded AChR entails connecting the resting-unliganded state C to the diliganded-active state  $A_2O$  (Fig. 1). The product of the equilibrium constants (or sum of the energy changes) for steps linking these states in the clockwise direction (the highlighted, physiological activation route) is the same as in the rarely taken, counterclockwise direction. The product of the counterclockwise constants is  $E_0/K_{dO}^2$ , the negative log of which is proportional to the total energy required for constitutive gating and binding to O at two sites,  $2\log(K_{dO}) - \log E_0$ . The product of the equilibrium dissociation constants connecting C with  $A_2C$  is  $1/K_{dC}^2$ , the negative log of which is proportional to the energy for just the binding part of clockwise activation,  $2\log(K_{dC})$ . We are interested only in the agonist component of the total energy and, because  $E_0$  is agonist independent, it can be ignored. Hence, the fraction of the total agonist energy that is used in binding is  $2\log K_{dC}/2\log K_{dO}$ , so efficiency, or the fraction of this total that is applied to gating, is

$$\eta = 1 - \frac{\log K_{dC}}{\log K_{dO}} \quad (5)$$

Efficacy and efficiency are distinct, but related, agonist attributes. In terms of energy, efficiency is equal to efficacy ( $\log K_{dO} - \log K_{dC}$ ) divided by

$\log K_{dO}$  (Eq. 5). An agonist can be high efficacy and low efficiency (epibatidine) or low efficacy and high efficiency (choline) but within limits. If an agonist has  $P_O^{\max} = 0.75$  (about the same as tetramethylammonium (TMA)) and  $\eta = 30\%$ , it would have unreasonably small equilibrium dissociation constants,  $K_{dC} = 27$  nM and  $K_{dO} = 15$  pM. In practice, high-efficacy agonists will also have high efficiencies.

Except for Fig. 8 A, we calculated efficiency from  $EC_{50}$ ,  $P_O^{\max}$ , and  $P_O^{\min}$  using a stepwise approach: 1)  $E_2$  from  $P_O^{\max}$  (Eq. 4), 2)  $K_{dC}$  from  $E_2$  and  $EC_{50}$  (Eq. 3), 3)  $K_{dO}$  from  $E_2$  and  $K_{dC}$  using a known value of  $E_0$  (Eq. 2), and finally, 4)  $\eta$  from the equilibrium dissociation constant ratio (Eq. 5). In Fig. 8 A only, an approximate value of  $\eta$  was calculated directly using Eq. 10 with  $A = 0$ .

Four prior results enabled us to estimate  $\eta$  from a CRC. First, adult AChR binding sites have approximately the same affinity, so only single values of the equilibrium dissociation constants needed to be estimated for each ligand. Second, scheme 1 and microscopic reversibility have been proved experimentally. Third, the unliganded gating equilibrium constant has been measured. In an “efficiency” plot for a group of ligands (10),  $E_0$  is estimated from the y-intercept (see Eq. 8, below). However, prior knowledge of  $I^{\min}$  ( $\sim E_0$ ) is required to estimate efficiency from a single CRC.  $I^{\min}$  is the same for all agonists and so needs to be estimated only once for each receptor (at a given membrane potential).

**TABLE 1** Efficiencies from single-channel CRCs

| s.no | Agonist            | Measured Values            |                                    |                |    | Calculated values |                      |                      |                     |                     |      |                          |
|------|--------------------|----------------------------|------------------------------------|----------------|----|-------------------|----------------------|----------------------|---------------------|---------------------|------|--------------------------|
|      |                    | EC <sub>50</sub> ± SE (μM) | P <sub>O</sub> <sup>max</sup> ± SE | n <sub>H</sub> | n  | E <sub>2</sub>    | K <sub>dC</sub> (μM) | K <sub>dO</sub> (nM) | log K <sub>dC</sub> | log K <sub>dO</sub> | η    | volume (Å <sup>3</sup> ) |
| 1    | ACh <sup>a</sup>   | 43                         | 0.96                               | 1.7            | ND | 23.4              | 174                  | 24                   | -3.76               | -7.62               | 0.50 | 77                       |
| ND   | ACh <sup>c</sup>   | ND                         | ND                                 | ND             | ND | ND                | 130                  | 18                   | -3.89               | -7.74               | 0.50 | ND                       |
| ND   | ACh <sup>d</sup>   | 22                         | 0.96                               | ND             | ND | 24                | 90                   | 12                   | -4.04               | -7.91               | 0.49 | ND                       |
| 2    | Nor <sup>b</sup>   | 72                         | 0.92                               | 1.0            | ND | 12                | 200                  | 38                   | -3.70               | -7.41               | 0.50 | 69                       |
| 3    | CCh <sup>a</sup>   | 320                        | 0.84                               | 1.6            | ND | 5.25              | 542                  | 159                  | -3.27               | -6.80               | 0.52 | 77                       |
| 4    | Ana <sup>b</sup>   | 524                        | 0.78                               | 1.2            | ND | 3.63              | 719                  | 253                  | -3.14               | -6.60               | 0.52 | 70                       |
| 5    | TMA <sup>a</sup>   | 1200                       | 0.75                               | 1.1            | ND | 3                 | 1480                 | 574                  | -2.83               | -6.24               | 0.54 | 77                       |
| 6    | DMT <sup>a</sup>   | 4200                       | 0.42                               | 0.8            | ND | 0.72              | 2730                 | 2150                 | -2.56               | -5.67               | 0.54 | 58                       |
| 7    | DMP <sup>a</sup>   | 6700                       | 0.26                               | 1.1            | ND | 0.35              | 3570                 | 4040                 | -2.45               | -5.39               | 0.54 | 56                       |
| 8    | Cho                | 4013                       | 0.05                               | ND             | ND | 0.05              | 4100                 | 15,100               | -2.39               | -4.82               | 0.50 | 77                       |
| 9    | DMPP <sup>5</sup>  | 246 ± 81                   | 0.87 ± 0.09                        | 1.3            | 3  | 6.69              | 480                  | 134                  | -3.32               | -6.87               | 0.52 | 59                       |
| 10   | 4OH-B <sup>5</sup> | 2171 ± 77                  | 0.29 ± 0.04                        | 0.9            | 3  | 0.41              | 1270                 | 1350                 | -2.92               | -5.87               | 0.50 | 77                       |
| 11   | 3OH-P <sup>5</sup> | 3485 ± 10                  | 0.15 ± 0.02                        | 0.6            | 4  | 0.18              | 1660                 | 2840                 | -2.78               | -5.55               | 0.50 | 77                       |
| 12   | Ebt <sup>5</sup>   | 32 ± 2                     | 0.60 ± 0.6                         | 1.9            | 4  | 1.50              | 28                   | 16                   | -4.55               | -7.78               | 0.41 | 88                       |
| 13   | Ebx <sup>5</sup>   | 90 ± 4                     | 0.74 ± 0.02                        | 1.6            | 3  | 2.85              | 108                  | 46                   | -3.96               | -7.33               | 0.46 | 88                       |
| 14   | Cyt <sup>5</sup>   | 137 ± 5                    | 0.18 ± 0.01                        | 1.3            | 4  | 0.22              | 67                   | 104                  | -4.17               | -6.99               | 0.40 | 114                      |
| 15   | Var <sup>*</sup>   | 135 ± 12                   | 0.015 ± 0.002                      | 4.8            | 3  | 0.02              | 57                   | 331                  | -4.25               | -6.48               | 0.35 | 102                      |
| 16   | TEA <sup>*</sup>   | 4200 ± 130                 | 0.002 ± 0.0007                     | 1.1            | 3  | 0.002             | 174                  | 26,800               | -2.76               | -4.57               | 0.40 | 136                      |
| 17   | TMP <sup>*</sup>   | 844 ± 32                   | 0.03 ± 0.002                       | 2.5            | 3  | 0.031             | 360                  | 1473                 | -3.44               | -5.83               | 0.41 | 87                       |
| 18   | Atx <sup>c</sup>   | ND                         | ND                                 | ND             | ND | ND                | 115                  | 247                  | -3.94               | -6.61               | 0.40 | 114                      |
| 19   | Aza <sup>c</sup>   | ND                         | ND                                 | ND             | ND | ND                | 934                  | 6053                 | -3.03               | -5.22               | 0.42 | 88                       |
| 20   | Nic <sup>b</sup>   | ND                         | ND                                 | ND             | ND | 0.87              | 1000                 | 920                  | -3.00               | -6.04               | 0.50 | 84                       |

E<sub>2</sub>, diliganded gating equilibrium constant; K<sub>dC</sub>, equilibrium dissociation constant to C; K<sub>dO</sub>, equilibrium dissociation constant to O (see Fig. 1); n, number of CRCs; ND, not determined.

EC<sub>50</sub>, P<sub>O</sub><sup>max</sup>, and n<sub>H</sub> were obtained by using Eq. 1. The unliganded gating equilibrium constant E<sub>0</sub> was 5.2 × 10<sup>-7</sup>. η efficiency was calculated using Eq. 5; volume is of the agonist's headgroup volume (Fig. S5). All entries pertain to wt adult AChRs.

<sup>a</sup>Previously published values are from (20).

<sup>b</sup>Previously published values are from (21).

<sup>c</sup>Previously published values are from (5).

<sup>d</sup>Previously published values are from (22).

<sup>e</sup>Previously published values are from (10).

### Statistical analyses

For both single-channel and whole-cell CRCs, the midpoint, maximum, and slope (EC<sub>50</sub>, P<sub>O</sub><sup>max</sup> or I<sup>max</sup>, and n<sub>H</sub>) were estimated by fitting by Eq. 1 using GraphPad Prism 6 (GraphPad). Eq. 9 was solved numerically for E<sub>2</sub> using the symbolic math program Wolfram Alpha.

The goodness of fit for the efficiency frequency distribution (Fig. 5 A) was estimated using Prism. The F-test rejects the null hypothesis (Gaussian fit) over a sum of two Gaussian with an F-value (F = 3.9) and significance (p-value < 0.05). A k-means cluster analysis algorithm (MATLAB; The MathWorks, Natick, MA) was used to define agonist groups for two-dimensional (2D) cluster analysis, both efficiency and headgroup volume (Fig. 5 B). Correlation significance between log EC<sub>50</sub> or log P<sub>O</sub><sup>max</sup>, measured from CRCs or calculated from each other (Fig. 8 A), was by Pearson's correlation test using Prism software. The p-value (two-tail) < 0.0001 and r<sup>2</sup> = 0.78 or 0.74 imply that there is a significant correlation.

### Agonists

Agonist structures are shown in Fig. 3, Fig. 4, and Fig. S5. Agonist headgroup volumes (Fig. 5 B) were calculated using Chimera (24). The following agonists were used: ACh, nicotine (Nor), nicotinic, carbamylcholine (CCh), anabasine, TMA, dimethylthiazolidinium (DMT), dimethylpyrrolidinium (DMP), choline (Cho), 3-hydroxypropyltrimethylammonium, 4-hydroxybutyltrimethylammonium, anatoxin (Atx), azabicycloheptane (Aza), TEA, epibatidine (Ebt), epiboxidine (Ebx), varenicline (Var), cytosine (Cyt), dimethylphenylpiperazinium (DMPP), and TMP. Cyt, Var, TEA, and TMP were from Sigma (St. Louis, MO). The sources for other agonists are given in previous publications (10,25).

## RESULTS

### ACh efficiency

Fig. 2 shows example single-channel currents and CRCs. For the neurotransmitter ACh, P<sub>O</sub><sup>max</sup> and EC<sub>50</sub> estimated by fitting the CRC by Eq. 1 are 0.96 and 43 μM (Table 1). From P<sub>O</sub><sup>max</sup>, we calculate the diliganded gating equilibrium constant, E<sub>2</sub> = 23.4 (Eq. 4). From this value and EC<sub>50</sub>, we calculate the low-affinity equilibrium dissociation constant, K<sub>dC</sub> = 174 μM (Eq. 3). The unliganded gating equilibrium constant at +70 mV is 5.2 × 10<sup>-7</sup> (see Materials and methods), so we calculate the high-affinity equilibrium dissociation constant is K<sub>dO</sub> = 26 nM (Eq. 2). Finally, from the ratio of the logs of the two equilibrium dissociation constants, we calculate the efficiency of the neurotransmitter, η<sub>ACh</sub> = 50% (Eq. 5).

We also calculated η<sub>ACh</sub> from published values of K<sub>dC</sub> and K<sub>dO</sub> obtained either from wild-type mouse AChRs (20) or from individual α-δ and α-ε human AChR binding sites (5), in both instances estimated by kinetic modeling of single-channel currents. The efficiencies calculated from these independent data sets are both 50% (Table 1).

At adult AChR binding sites, half of the neurotransmitter binding energy is applied to the gating conformational

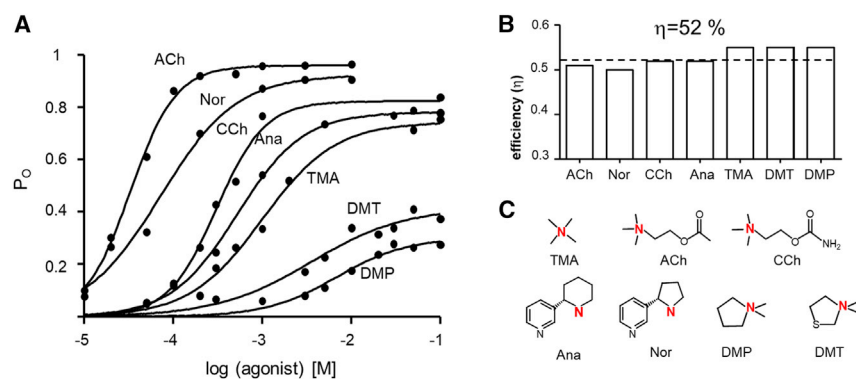

**FIGURE 3** Efficiencies from single-channel CRCs. (A) CRCs of seven agonists in adult-type mouse AChRs (replotted from (20)). There is an inverse correlation between  $EC_{50}$  and  $P_O^{\max}$  (Table 1). (B) Agonist efficiencies calculated from  $EC_{50}$  and  $P_O^{\max}$ . All agonists have a similar efficiency (average, 52%; dashed line). (C) Agonist structures (see Materials and methods for abbreviations). Red represents the key nitrogen atom in the agonist's headgroup. To see this figure in color, go online.

change. That is, at each of the two binding sites, the energy change when ACh binds to the C conformation is approximately equal to the increase in binding energy that happens within the C-to-O transition.

### Efficiency of other agonists

We fitted other previously published, single-channel CRCs (20) to estimate  $EC_{50}$  and  $P_O^{\max}$  and, from these, calculated agonist  $\eta$ -values as described above (Fig. 3; Table 1). Despite the wide ranges in both  $EC_{50}$  (43  $\mu$ M to 6.7 mM) and  $P_O^{\max}$  (0.26–0.96), all eight of these agonists (including ACh) have a similar efficiency,  $\eta = 52 \pm 2\%$  (mean  $\pm$  SD) (Fig. 3 B). The efficiency of the lowest-efficacy agonist in this group, DMP, was greater than that of the highest-efficacy agonist, ACh. This highlights the distinction between

efficiency (that depends on the binding energy ratio) and efficacy (that depends on the binding energy difference).

Next, we measured efficiencies for agonists that were not studied previously by CRCs (Fig. 4). Choline (Cho) has two methylenes between its quaternary nitrogen and hydroxyl (OH) group versus 3 and 4 for 3-hydroxybutyltrimethylammonium and 4-hydroxypropyltrimethylammonium (4OH-PTMA). Cho is a low-affinity, low-efficacy agonist (26) that  $K_{dC}$  and  $K_{dO}$  values estimated by modeling single-channel kinetics at the human  $\alpha$ - $\epsilon$  site indicate has a similar efficiency as does ACh (10). Simulations of binding site structures suggest that an H-bond between the terminal OH and the backbone carbonyl of  $\alpha$ W149 serves to position the charged nitrogen of choline away from the aromatic rings that line the cavity to reduce favorable binding energy (27,28). Inserting additional methylenes reduces the

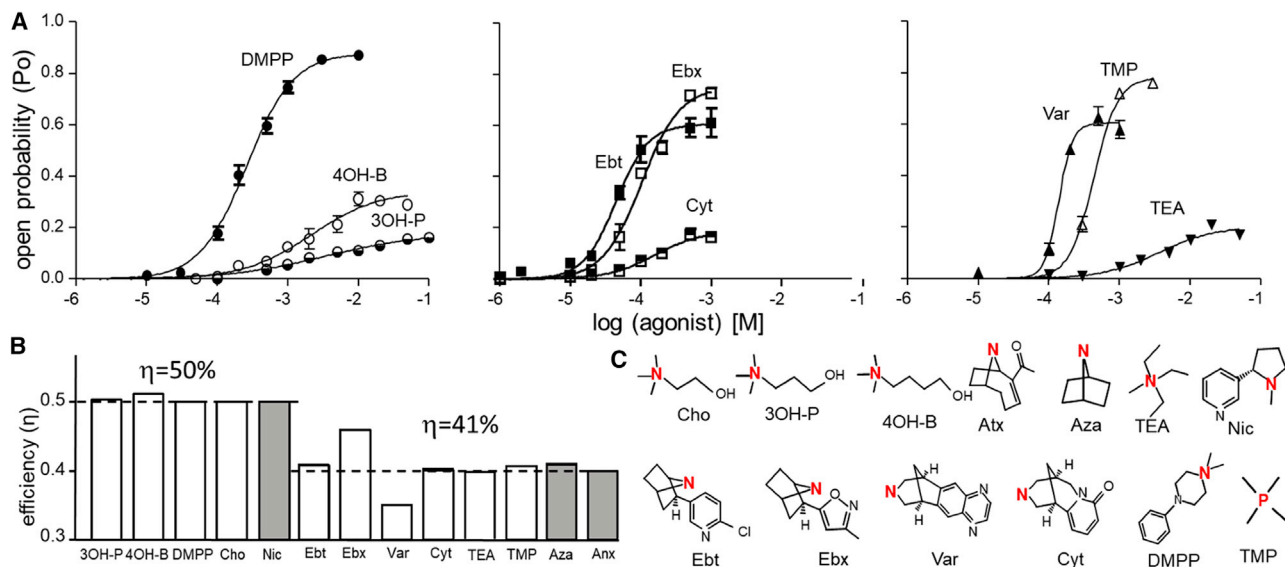

**FIGURE 4** Efficiencies from more single-channel CRCs. (A) Single-channel CRCs of nine agonists in adult-type mouse AChRs (symbols, mean  $\pm$  SE). In some cases, background mutations were used to increase constitutive gating and, hence, increase  $P_O^{\max}$  and left-shift  $EC_{50}$  ( $\epsilon$ S450W, left and middle;  $\epsilon$ L269F +  $\epsilon$ E181W, right).  $EC_{50}$  and  $P_O^{\max}$  values in Table 1 have been corrected for these backgrounds and pertain to wt AChRs. (B) Efficiencies calculated from the CRCs (open bars) or from previously reported measurements of  $K_{dC}$  and  $K_{dO}$  obtained by kinetic modeling (gray bars (5,21)). There are two populations with average efficiencies of 50 and 41% (dashed lines). (C) Agonist structures. Red represents key nitrogen or phosphorous atom in the agonist's headgroup. To see this figure in color, go online.

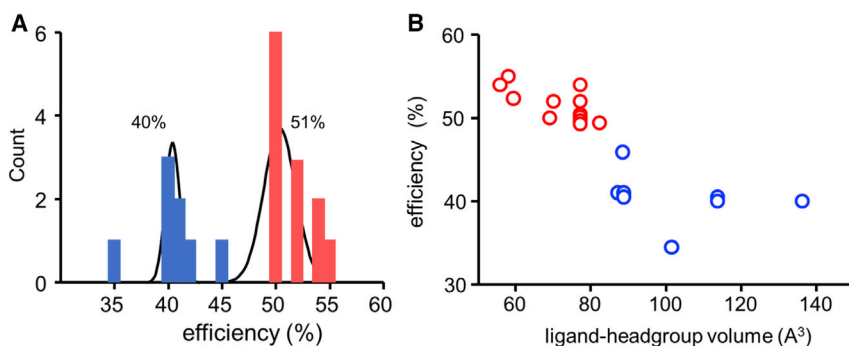

FIGURE 5 Distribution of agonist efficiency. (A) Distribution of efficiencies for 20 agonists, fitted by the sum of two Gaussians. There are two populations at  $\eta = 51 \pm 2\%$  and  $40 \pm 4\%$  (mean  $\pm$  SD). (B) 2-D scatter plot of efficiency versus headgroup volume ( $v$ ). Cluster analysis (k-means) shows that there are two populations with  $\eta/v$  centroids at  $52\%/70.4 \text{ \AA}^3$  (red) and  $41\%/102.2 \text{ \AA}^3$  (blue). To see this figure in color, go online.

probability of this H-bond and allows a more-optimal position that increases binding energy relative to Cho.

The CRCs and associated  $P_{O^{\max}}$  and  $EC_{50}$  values for 3-hydroxybutyltrimethylammonium and 4OH-PTMA are shown in Fig. 4 A (left). From the calculated equilibrium dissociation constants, we estimate  $\eta$  is 50% for both agonists (Table 1). Despite the substantial range in affinity and efficacy afforded by the different H-bond propensities, all three of the choline agonists have the same efficiency that is similar to the efficiencies of the agonists shown in Fig. 3. The similarity in the C versus O binding energy ratio (but not the difference) for these three ligands suggests that the effect of the H-bond on the position of the nitrogen atom applies equally to C and O binding cavities.

Fig. 4 A (left) also shows the CRC of DMPP, a nicotinic receptor agonist that is selective for the  $\alpha 3\beta 4$  (ganglionic) subtype (29). The result was  $\eta_{\text{DMPP}} = 52\%$  (Table 1).

Overall, the mean  $\pm$  SD efficiency calculated from CRCs for the 11 agonists described so far (ACh, nornicotine, CCh, anabasine, TMA, DMP, DMT, Cho, 4-hydroxybutyltrimethylammonium, 4OH-PTMA, and DMPP) is  $52 \pm 2\%$ . For this entire group of ligands, that covers a huge range in potency and efficacy; the binding energy ratio  $\log K_{dC}/\log K_{dO}$  is 0.48. Hence, for all of these agonists, binding energy increases by a factor of 2.1 (the inverse of this ratio) when the liganded sites switch from low to high affinity at the beginning of the global, channel opening transition.

Fig. 4 A (middle) shows CRCs for three agonists that have a bridge in their headgroup. The efficiency values for epibatidine, Ebx, and cytisine calculated from  $P_{O^{\max}}$  and  $EC_{50}$  were  $\eta_{\text{ebt}} = 41\%$ ,  $\eta_{\text{ebx}} = 46\%$ , and  $\eta_{\text{cyt}} = 40\%$ . The first two values are similar to those estimated previously by kinetic modeling at the human  $\alpha 1-\delta$  binding site (10).

Fig. 4 A (right) shows CRCs for three agonists that have extraordinarily low efficacies and affinities. To study these, we added background mutations that did nothing more than increase  $E_0$  and, hence, increase  $P_{O^{\max}}$  and left-shift  $EC_{50}$  (Eqs. 2–4). After correcting for the effects of the background mutations, from the CRC parameters, we estimate that in wt AChRs,  $\eta_{\text{TEA}} = 40\%$ ,  $\eta_{\text{TMP}} = 41\%$ , and  $\eta_{\text{var}} = 35\%$ .

For the group of six ligands shown in Fig. 4 A (middle and right) (Ebt, Ebx, Cyt, Var, TEA, and TMP), the average efficiency was  $41 \pm 4\%$  (Fig. 4 B). For all these ligands, the binding energy ratio ( $\log K_{dC}/\log K_{dO}$ ) is  $\sim 0.60$ , indicating that binding energy increases by a factor of  $\sim 1.7$  when the sites switch from C to O.

Fig. 5 A shows a histogram of efficiency values for 17 agonists estimated from single-channel CRCs plus three agonists estimated from single-channel kinetic modeling (Atx, Aza, and nicotine; Fig. 4 C) (10,21). A goodness of fit test indicates that a bimodal (sum of two Gaussians) frequency distribution is a better fit than a single Gaussian ( $F(3,16) = 3.37$ ,  $p = 0.044$ ). The two populations have efficiencies of  $51 \pm 2\%$  and  $40 \pm 1\%$  (mean  $\pm$  SD), which is comparable to the mean efficiencies discussed above.

We also estimated the volumes of the headgroup of the agonists (Fig. S5; Table 1) and plotted these versus efficiency (Fig. 5 B). A 2D cluster analysis again shows two populations with efficiencies of  $\eta_1 = 52\%$  ( $n = 12$ ) and  $\eta_2 = 41\%$  ( $n = 8$ ) with corresponding volumes of  $v_1 = 70.4 \pm 8.8$  and  $v_2 = 102.2 \pm 17.8 \text{ \AA}^3$  (centroid  $\pm$  SD). There is an inverse relationship between agonist efficiency and headgroup volume.

## CRCs from whole-cell currents

Single-channel CRCs may offer an accurate method for estimating  $K_{dC}$  and  $E_2$ , but CRCs constructed from whole-cell responses are more common. To ascertain the extent to which  $\eta$  estimated from whole-cell CRCs might be influenced by slow perfusion (that allows desensitization to reduce some peak amplitudes) and heterogeneous receptor properties, we measured whole-cell current amplitude as a function of concentration using four agonists, three from the high-efficiency group (ACh, CCh, and TMA) and one from the low-efficiency group (Ebt).

In whole-cell CRCs with maximums normalized to the response to  $300 \mu\text{M}$  ACh response (Fig. 6 A),  $EC_{50}$  values were left-shifted compared to those in single-channel CRCs by an amount that increased with agonist efficacy (Table 2, left). For example, the left-shift was more substantial for ACh ( $12.2$  vs.  $43 \mu\text{M}$ ) than for TMA ( $0.84$  vs.  $1.2 \text{ mM}$ ).

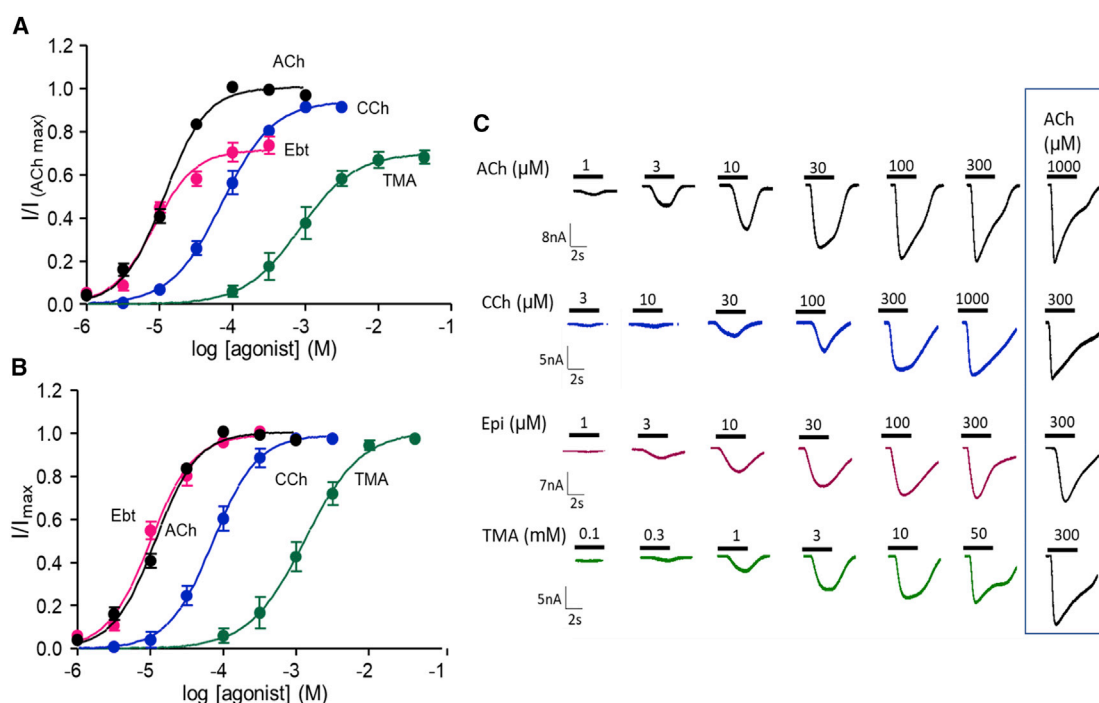

FIGURE 6 Whole-cell current CRCs. (A) Each current response was normalized to that of 300  $\mu\text{M}$  ACh ( $P_0 = 0.93$ ).  $I^{\text{max}}$  and  $\text{EC}_{50}$  values are in Table 2 (left). (B) CRCs normalized to  $I^{\text{max}} = 1$ .  $\text{EC}_{50}$  values are in Table 2 (right). (symbols, mean  $\pm$  SE) (C) Example currents. To see this figure in color, go online.

An independent whole-cell CRC measurement, also made using an automated patch-clamp and adult-type AChRs, was 22  $\mu\text{M}$  for  $\text{EC}_{50}$  for ACh (22). We attribute this left-shift to desensitization (see Materials and methods). Despite this error, for all four agonists, the efficiency values estimated from whole-cell CRCs were only slightly smaller than those estimated from single-channel measurements.

Because the number of receptors contributing to responses varies from cell to cell and with time, whole-cell CRCs are often normalized so that the maximal response for each agonist is 1. We did this for the four whole-cell CRCs to estimate new values for  $\text{EC}_{50}$  (Fig. 6 B; Table 2, right). It was not possible to estimate efficiency from these plots because information regarding efficacy was removed, but below, we

show that with knowledge of  $\eta$  and  $I^{\text{min}}$ ,  $I^{\text{max}}$  can be recovered from  $\text{EC}_{50}$  of a CRC that has been normalized to 1.

### Binding site mutations

$K_{\text{dC}}$  and  $K_{\text{dO}}$  have been measured by kinetic modeling of single-channel currents from mouse, adult-type AChRs having a mutation at one of the five aromatic residues at each of the two binding sites (30). We calculated from these values  $\eta_{\text{ACh}}$  for 21 different mutants (Table S1). Fig. 7 A shows that the distribution is Gaussian with  $\eta_{\text{ACh}} = 51 \pm 4\%$  (mean  $\pm$  SD), which is the same as in wt AChRs. The exceptions were  $\alpha\text{Y190A}$  (in loop C) that decreased  $\eta_{\text{ACh}}$  to 35% and mutations of  $\alpha\text{W149}$  (in loop B) that increased  $\eta_{\text{ACh}}$  by up to 60% in  $\alpha\text{W149A}$ . Removal of the  $\alpha\text{Y190}$  side chain results in a  $\sim 30\%$  decrease in efficiency, whereas removal of the  $\alpha\text{W149}$  side chain results in a  $\sim 20\%$  increase in efficiency.

Mutations of a residue on the complementary side of the binding site,  $\epsilon\text{P121}$ , had little effect on ACh efficiency except, perhaps, for the slow-channel myaesthenic syndrome mutation  $\epsilon\text{P121L}$  (31).

Binding and gating equilibrium constants have also been reported for AChRs having a mutation of  $\alpha\text{G153}$  (21). This amino acid is in loop B and close to  $\alpha\text{W149}$  but does not appear to contact the agonist directly. However,  $\alpha\text{G153}$  is interesting because so far it is the only binding site amino acid we know of in which mutations decrease  $K_{\text{dC}}$  (increase binding energy) and increase significantly  $E_0$ . We calculated

TABLE 2 Whole-cell CRC parameters and efficiency ( $\eta$ ) estimates

| Agonist | $I^{\text{max}} = \text{response to } 300 \mu\text{M ACh}$ |                                |                |        | $I^{\text{max}} = 1$                         |     |
|---------|------------------------------------------------------------|--------------------------------|----------------|--------|----------------------------------------------|-----|
|         | $\text{EC}_{50} \pm \text{SE} (\mu\text{M})$               | $I^{\text{max}} \pm \text{SE}$ | $n_{\text{H}}$ | $\eta$ | $\text{EC}_{50} \pm \text{SE} (\mu\text{M})$ | $n$ |
| ACh     | $12.2 \pm 0.7$                                             | 0.96                           | 1.5            | 0.47   | $12.2 \pm 0.7$                               | 6   |
| CCh     | $72.2 \pm 11$                                              | $0.91 \pm 0.04$                | 1.2            | 0.50   | $72.4 \pm 6$                                 | 6   |
| TMA     | $843 \pm 110$                                              | $0.70 \pm 0.04$                | 1.2            | 0.52   | $1328 \pm 160$                               | 4   |
| Ebt     | $8.42 \pm 1.0$                                             | $0.72 \pm 0.02$                | 1.5            | 0.39   | $10 \pm 1.2$                                 | 8   |

$n$ , number of trials (up to 20 cells each).

Left,  $\text{EC}_{50}$ ,  $I^{\text{max}}$ , and  $n_{\text{H}}$  from CRCs normalized by the response to 300  $\mu\text{M}$  ACh (Fig. 6 A;  $I^{\text{max}}$  for ACh determined from single-channel currents;  $I^{\text{min}}$ ,  $5.9 \times 10^{-7}$ ). Right,  $\text{EC}_{50}$  from CRCs internally normalized to  $I^{\text{max}} = 1$  (Fig. 6 B).



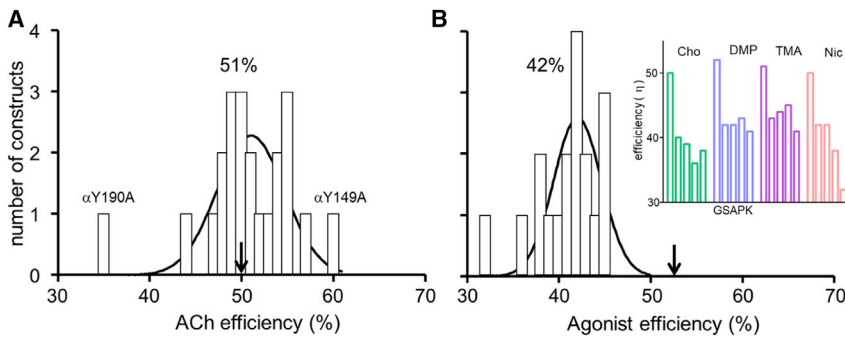

**FIGURE 7** Effect of binding site mutations on agonist efficiency. Mutations were at both adult-type binding sites. (A) Mutations of aromatic amino acids and eP121 (agonist, ACh) (Table S1). Arrow marks wt efficiency. The only substitutions to alter efficiency significantly are  $\alpha$ Y190A and  $\alpha$ W149A. Gaussian fit of frequency distribution for 21 mutants (excluding  $\alpha$ Y190A) gives  $\eta = 51 \pm 4\%$  (mean  $\pm$  SD). (B) Mutations of  $\alpha$ G153 activated by four high-efficiency agonists (Table S2 and inset) (21). Gaussian fit of frequency distribution for all 16 mutation/agonist combinations gives  $\eta = 42 \pm 3\%$ . To see this figure in color, go online.

efficiencies from  $K_{dC}$ ,  $E_2$ , and  $E_0$  values for 16 different  $\alpha$ G153 mutant/agonist combinations using agonists from the high-efficiency population (Table S2).

The distribution of these efficiencies is shown in Fig. 7 B. With a  $\alpha$ G153 mutation,  $\eta = 42 \pm 3\%$ , which is  $\sim 20\%$  smaller than the wt. This is the same efficiency as the low-efficiency agonist population in wt AChRs.  $\alpha$ G153 mutations that increase affinity also decrease efficiency. The extent of the reduction in  $\eta$  was similar for all agonists and side-chain substitutions, with the exception of  $\alpha$ G153K + nicotine. In summary, it appears that a glycine at position  $\alpha$ 153 allows high efficiency for small-volume agonists that otherwise take on the low-efficiency characteristic of large-volume agonists.

### Putting efficiency to use

In this section, we show how knowledge of  $\eta$  can simplify and extend CRC analysis. The same efficiency for a group of agonists means that for all, the  $\log K_{dC}/\log K_{dO}$  ratio is the same. Hence, the two equilibrium dissociation constants are related by an exponent,

$$K_{dC} = K_{dO}^{1-\eta}. \quad (6)$$

With knowledge of  $\eta$ , only one of the equilibrium dissociation constants needs to be measured. The value of the exponent in Eq. 6 in wt AChRs is  $\sim 0.5$  for the high-efficiency group of agonists and  $\sim 0.6$  for the low-efficiency group. Accordingly, Eq. 2 becomes

$$(E_2/E_0) = K_{dC}^p, \quad (7)$$

where

$$p = 2\eta/(\eta - 1).$$

The two reflect the number of equivalent binding sites. For the higher efficiency group ( $\eta = 0.5$ ),  $p = -2.00$ , and for the lower efficiency group ( $\eta = 0.4$ ),  $p = -1.33$ .

Taking the log of Eq. 7 and rearranging,

$$\log E_2 = p \log K_{dC} + \log E_0. \quad (8)$$

This equation describes an “efficiency” plot, with the x axis being proportional to agonist binding energy ( $\log K_{dC}$ ) and the y axis being proportional to gating energy ( $\log E_2$ ). For a group of agonists having the same efficiency, a log-log plot of gating versus binding equilibrium constants is a straight line with a slope ( $p$ ) that depends on efficiency and a y-intercept that gives the unliganded gating equilibrium constant (Eq. 8). Previously, these constants determined from kinetic modeling were used to estimate average  $\eta$ -values for four ACh- and Ebt-class agonists at individual AChR binding sites (10). In addition, values of these constants obtained from the literature were fitted by Eq. 8 to estimate  $E_0$  and average  $\eta$ -values for agonists of other receptors, with off-line points reflecting agonists having other efficiencies.

The clustering of AChR efficiency values into two populations that correlate with agonist size (Fig. 5) suggests that it may someday be possible to predict approximately an agonist’s efficiency a priori from its structure and that of the binding cavity. For example, it is reasonable to guess that in adult-type muscle AChRs, other choline or nicotine derivatives will have  $\eta \sim 50\%$  and that congeners of Ebt and TEA will have  $\eta \sim 40\%$ . More experiments are needed to test the hypothesis that headgroup volume and binding site structure in combination can be used to estimate  $\eta$ . We again note that  $E_0$  ( $I^{\min}$ ) is agonist independent and needs to be measured only once, so perhaps in the future, this important constant will be known for many different receptors.

Given prior knowledge of agonist  $\eta$  and receptor  $I^{\min}$ , the CRC parameters  $EC_{50}$  and  $I^{\max}$  (the response at a single, high agonist concentration) can be estimated from each other, as follows.

First, we calculate  $EC_{50}$  from  $I^{\max}$  (whole-cell CRCs normalized to an ACh response; Table 2, left). The procedure is to solve  $E_2$  from  $I^{\max}$  (Eq. 4),  $K_{dC}$  (Eq. 7;  $\eta$  equal to the value shown in Table 2), and then  $EC_{50}$  (Eq. 3). Fig. 8 B (left) shows that calculated and experimental  $EC_{50}$  values are correlated (Pearson’s correlation,  $r^2 = 0.78$ ,  $p < 0.0001$ ). Fig. 8 C (left) shows that there is a good match between experimental current amplitudes normalized to an ACh response (Fig. 6 A) and those calculated from  $\eta$  according to Eq. 1 using the new  $EC_{50}$  estimates.  $E_2$  has been

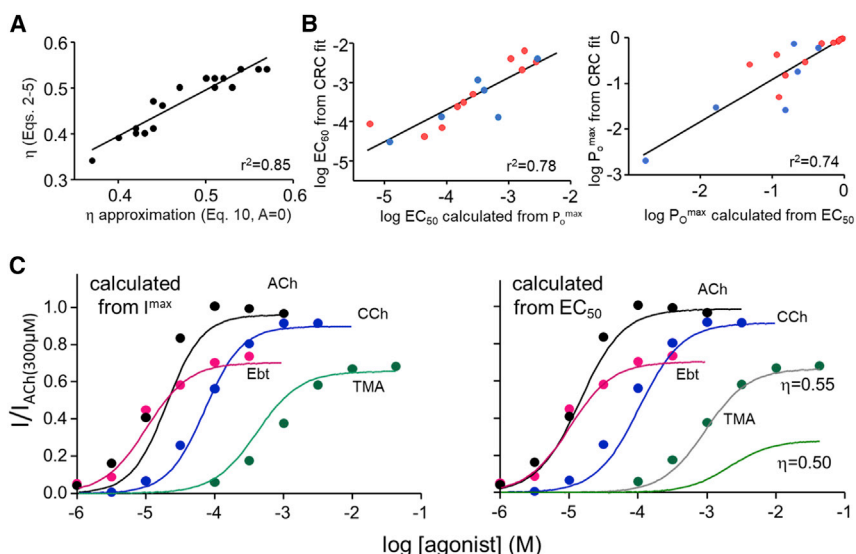

**FIGURE 8** Using efficiency to calculate CRC parameters. (A) Approximate efficiencies calculated in a single step (Eq. 10, with  $A = 0$ ) match efficiencies calculated in multiple steps (Eqs. 2–5). (B) If  $\eta$  and  $E_0$  are known,  $EC_{50}$  and  $I^{\max}$  ( $P_0^{\max}$ ) can be calculated from each other. Left, calculated versus measured  $EC_{50}$  from single-channel CRCs is shown.  $\eta$  for each agonist is given in Table 2. Right, calculated versus measured  $P_0^{\max}$  using  $\eta = 50\%$  (red) or 40% (blue) is shown. (C) Left, CRCs drawn using calculated  $EC_{50}$  and measured  $I^{\max}$  (Table 2, left) superimposed on whole-cell current responses (Fig. 6 A). Right, CRCs are drawn using calculated  $I^{\max}$  and measured  $EC_{50}$  (Table 2, right) using  $\eta = 50\%$  for ACh, CCh, and TMA and 40% for Ebt. With TMA,  $\eta = 55\%$  improves the match. To see this figure in color, go online.

measured for many AChR agonists (28). Using the above procedure, we estimated corresponding  $EC_{50}$  values assuming  $\eta = 51\%$  and  $E_0 = 7.4 \times 10^{-7}$  (Table S3). CRCs for these agonists have not been measured but doing so would test further the ability to use  $\eta$  and  $E_0$  to calculate  $EC_{50}$  from  $P_0^{\max}$ .

Second, we calculate  $I^{\max}$  from  $EC_{50}$  values (whole-cell CRCs normalized to 1; Table 2, right). Solving Eqs. 7 and 3 for  $K_{dC}$  and setting them equal yields

$$\frac{EC_{50}(E_2 + 1)}{\sqrt{(E_2 + 2)}} = \left(\frac{E_2}{E_0}\right)^{(1/p)} \quad (9)$$

$E_2$  and  $E_0$  can be calculated from  $I^{\max}$  and  $I^{\min}$  (Eq. 4). We solved Eq. 9 for  $I^{\max}$  using known values for  $\eta$  and  $I^{\min}$  and  $EC_{50}$  from normalized CRCs. Fig. 8 B (right) is a plot of calculated versus experimental  $P_0^{\max}$  values from single-channel CRCs using an approximate value for  $\eta$ , either 50% (ACh, CCh, and TMA) or 40% (Ebt). Again, there is rough agreement (Pearson's correlation,  $r^2 = 0.74$ ,  $p < 0.0001$ ). Next, these calculated  $I^{\max}$  values were used to generate CRCs (Eq. 1) that were compared to experimental ones that were not normalized to 1 (Fig. 8 C, right). The match is good for ACh, CCh, and Ebt but not for TMA. Increasing  $\eta_{TMA}$  from 0.50 to 0.55 makes the calculated and experimental curves match more closely. The  $I^{\max}$  value calculated from  $EC_{50}$  by using Eq. 9 is sensitive to the value of  $\eta$  (Fig. S6). Nonetheless, knowledge of agonist efficiency allows efficacy information to be recovered approximately from a CRC that has been normalized to a maximal response of 1.

In addition, knowledge of  $\eta$  allows the estimation of  $E_0$  from a single CRC.  $E_0$  is of critical importance because it sets the baseline level from which agonists increase  $P_0$ ,

but it is often small and difficult to measure directly (8,32,33). However, a fold change in  $E_0$  caused by a mutation or a modulator will produce the same fold change in  $E_2$  (Eq. 2) and, hence, a change in both  $EC_{50}$  and  $P_0^{\max}$  (Eqs. 3 and 4).

The procedure we used to estimate  $E_0$  ( $I^{\min}$ ) from a CRC of a wt receptor is first to solve for  $E_2$  and  $K_{dC}$  from  $P_0^{\max}$  and  $EC_{50}$  as described above and then solve for  $E_0$  by using Eq. 8. Fig. S7 shows  $E_0$  values so calculated from single-channel CRC parameters. The mean result is reasonably close to the experimentally determined value (17).

Finally, it is possible to gain an approximate estimate of  $\eta$  from CRC parameters in a single step. Taking the log of Eq. 9 and rearranging

$$p = \frac{\log E_2 - \log E_0}{\log EC_{50} - A}$$

$$A = 0.5 \log(E_2 + 2) - \log(E_2 + 1), \quad (10)$$

$$\eta = p/(p - 2)$$

where  $E_2 = I^{\max}/(1 - I^{\max})$  and  $E_0 = I^{\min}$ . For many AChR agonists,  $E_2 < 25$  and  $EC_{50} < 10^{-3}$  M, so  $A$  will usually be much less than  $\log(EC_{50})$ . Hence, a reasonable approximation for agonist efficiency can be obtained simply by using Eq. 10 with  $A$  equal to zero. Fig. 8 A shows that  $\eta$ -values calculated using this shortcut indeed approximate the more-exact values calculated stepwise using Eqs. 2–5.

## DISCUSSION

The notion of agonist efficiency arose from an experimental observation—in neuromuscular AChRs, the binding

energy ratio  $\log K_{dC}/\log K_{dO}$  is the same for many different nicotinic agonists (20). Later, this ratio was associated with the efficiency at which agonist binding energy is converted into receptor gating energy (10). Here, we show that agonist efficiency can be estimated from the asymptotes and midpoint of a CRC. Below, we discuss the nature and distribution of efficiency values obtained from single-channel and whole-cell CRCs, some structural implications of efficiency, and applications of efficiency to CRC analysis.

## Efficiency

Agonist efficiencies are the same whether obtained from single-channel or whole-cell currents and from a CRC or by detailed kinetic modeling. They are the same in wild-type AChRs that have two binding sites or in crippled AChRs that have just one operational site. Efficiency values are the same in mouse and human AChRs and with many mutations at the binding sites (exceptions discussed below) or in distant regions that do not affect binding. In AChRs, efficiency is a robust agonist attribute. At adult neuromuscular synapses, half of the available neurotransmitter binding energy is converted into kinetic energy of the channel opening conformational change.

In AChRs, there are two populations of  $\eta$ -values, at  $51 \pm 2\%$  and  $40 \pm 4\%$  (Fig. 5 A). Despite the small SDs, we suspect that the variance within each group arises from actual, ligand-specific differences rather than from measurement errors for the following reasons. 1) Efficiency is a ratio of logarithms and therefore is not sensitive to errors in the measured values of  $EC_{50}$  and  $P_O^{\max}$ . For example, changing  $EC_{50}$  or  $P_O^{\max}$  (Table 1) by  $\pm 10\%$  changes the calculated  $\eta$ -value by  $<1\%$ . 2) The order of  $\eta$ -values within the high-efficiency group is the same in single-channel and whole-cell experiments (TMA > CCh > ACh), and 3) a small difference in efficiency leads to a large difference in efficacy calculated from  $EC_{50}$  (Fig. S6). The single-channel  $\eta$ -value for TMA predicts the experimental, whole-cell CRC more accurately than does the group value (Fig. 8 C, right). We hypothesize that the efficiency difference between, for example, ACh and TMA is meaningful (Fig. 3 B).

The observation that mutations of  $\alpha G153$  shift  $\eta$  for four agonists from the high- to the low-efficiency population supports the existence of two discrete  $\eta$ -populations. Although the distribution of agonist efficiency appears to be modal rather than continuous, the high accuracy of experimental  $\eta$ -estimates must be considered. More experiments might reveal if other  $\eta$ -populations exist or if small differences between agonists or mutations are meaningful. For example, the observations that  $\eta$  is modestly lower with  $\epsilon P121$  substitutions (Table S1), higher with most nonaromatic substitutions of  $\alpha Y198$  (Table S1), and usually lowest with a K substitution at  $\alpha G143$  (Table S2) might prove to be meaningful. Likewise, experiments might show that the 35% ef-

iciency values for varenicline and ACh +  $\alpha Y190A$  indicate the existence of a third population.

## Structural implications

That a group of agonists have the same efficiency means that all members have the same binding energy ratio,  $\log K_{dC}/\log K_{dO}$  (Eq. 5). Below, we discuss implications of this result with regards to 1) rearrangements at the binding site, 2) agonist volume, 3) the bimodal efficiency distribution, and 4) binding site mutations.

The energy of low-affinity binding is proportional to  $\log K_{dC}$  and is determined mainly not by diffusion but rather by a local rearrangement at the binding site called “catch.” The energy of the switch from low to high affinity is proportional to  $(\log K_{dO} - \log K_{dC})$ , occurs at the beginning of the global channel opening isomerization, and is called “hold” (30,34). As discussed elsewhere (34), “hold” is related to, and possibly the same as, an intermediate (pre-opening) gating state called “flip” that has been detected directly (35,36). “Flip” refers to a brief shut state that is high affinity, and “hold” refers to the rearrangement of the binding site that generates such a state (37). Regardless, a group efficiency implies that for all members, the energy change in hold is  $1/(1 - \eta)$  times that of catch. This factor is  $\sim 2$  for high- and  $\sim 1.7$  for low-efficiency agonists.

This linear relationship between catch-and-hold energy changes suggests that the associated structural changes too are related. Accordingly, the observation that many agonists have the same efficiency suggests that the binding site rearrangements in catch and in hold can be considered as two stages of a single conformational sweep. Although “binding” and “gating” have long been considered to be distinct processes (38), a group efficiency implies that they are components of a multipart structural-change cascade. In AChRs, this cascade begins with a “touch” by the agonist that takes place after the ligand has diffused to its target but before binding site rearrangements that form the low-affinity complex and ends when ions begin to cross the membrane. The “catch-and-hold” sweep of the binding sites is the first part of this cascade, with  $\eta$  quantifying the strength of the connection between the binding (catch) and gating (hold) components.

It remains to be determined whether or not a shared binding energy ratio for a group of related agonists is a general feature of receptor activation. It appears that in some receptors other than neuromuscular AChRs, there is a linear relationship between  $\log$  gating and  $\log$  binding equilibrium constants for related ligands and that association to C is slower than diffusion. These results raise the possibility that a shared  $\log K_{dC}/\log K_{dO}$  ratio and a correlation between structural changes in low- and high-affinity complex formation are not exclusive to AChRs (10).

Members of both efficiency populations can have a quaternary amine (TMA and TEA) or a secondary amine

(DMPP and Ebt). Hence, it does not appear that the bimodal distribution in efficiency reflects this aspect of the agonist's headgroup. The inverse correlation between agonist headgroup volume and efficiency is more relevant (Fig. 5 B). Simulations of AChR structures suggest that the agonist binding cavity is smaller in O compared with C, and hence, that binding site contraction is a structural correlate of "hold" (27). In addition, kinetic analyses of AChR gating indicate that in the channel opening isomerization, "hold" is followed by a rearrangement of the extracellular domain (4,34,39,40).

These results lead us to hypothesize that large-volume, low-efficiency agonists encounter steric hindrance when the binding cavity contracts in "hold" to limit the shrinkage and, hence, the mechanical force applied to the next element in the gating sequence, the extracellular domain. We imagine that small, high-efficiency ligands fit comfortably into both C and O pockets but that large, low-efficiency agonists do not fit easily into the smaller O cavity and so support a smaller contraction. According to this hypothesis, large ligands transfer less energy to the next step in the conformational cascade and thus have low efficiencies.

In support of this idea, the smallest agonists we tested, DMP, DMT, and TMA, have the largest efficiencies (Fig. 3 B). Further, simulations show that compared to ACh, the binding cavity is smaller with TMA, and the extent of cavity contraction is smaller with the low-efficiency agonist Ebx (27). However, the relationship between agonist volume and efficiency is not simple because Ebt and TEA have similar efficiencies despite a substantial difference in volume (Table 1).

There are two efficiency populations (Fig. 5 A). One possible explanation is that each efficiency group reflects a different "hold" binding site conformation. In this view, the high-affinity cavity can adopt only a limited number (so far, two) of "preset" structures and is not malleable or able to adapt its shape to each agonist. Perhaps, small versus large agonists allow the pocket to adopt alternative contracted shapes, with all agonists larger than some threshold forcing the less-efficient shape. Another hypothesis for the bimodal distribution of  $\eta$  is that there are two discrete energy transfer pathways that supply energy for activating the extracellular domain. Both paths are activated with smaller agonists but one (or both) is compromised when the pocket is "stretched" by a large ligand. Both of these hypotheses are speculations that can be tested experimentally.

Aromatic side chains at the binding site govern agonist affinity. Although most mutations of these have little or no effect on  $\eta$ , another clue regarding the structural basis of efficiency is that the efficiency of ACh is reduced by 30% by the mutation  $\alpha$ Y190A (in loop C) and increased by 20% by the mutation  $\alpha$ W149A (in loop B).  $\alpha$ Y190 appears to be the most-important aromatic side chain with regards to the propagation of structural changes from the binding site in channel opening (25,41). That the mutations  $\alpha$ Y190F

and  $\alpha$ Y190W have little effect on ACh efficiency suggests that the key interaction here is with the aromatic ring rather than with the OH group.

All four mutations of  $\alpha$ G153 (in loop B) reduced the efficiency of all four tested agonists. Again, the drop appeared to be modal, reducing the average efficiency from 51 to 42%. At this juncture, we do not have a hypothesis for the structural basis for this decrease in efficiency. Perhaps, molecular dynamics simulations can test if flexibility of the loop B backbone promotes high efficiency. It will be worthwhile to ascertain experimentally the extent to which the  $\alpha$ W149A and  $\alpha$ G153 mutations are correlated.

Efficiency estimates for the two populations are the same whether measured in whole receptors (that have  $\alpha$ - $\delta$  and  $\alpha$ - $\epsilon$  binding sites) or in receptors having only one functional site (10). This indicates that the energy changes that contribute to efficiency are determined mainly by local ligand-protein interactions at each binding site, with little or no energy transfer between sites. The efficiency of Ebx is somewhat higher in whole receptors compared with  $\alpha$ - $\delta$  alone, so it is possible that the efficiency of this agonist is modestly greater at one site ( $\alpha$ - $\epsilon$ ) compared with the other. Agonist affinity is greatest at the fetal ( $\alpha$ 1- $\gamma$ ) neurotransmitter binding sites (56% for ACh), and it is possible that the some of the small, agonist-dependent differences in  $\eta$  between adult sites are meaningful.

## Applications

Because  $\eta$ -values are modal, efficiency can be used to classify agonists. Someday, efficiency may stand alongside affinity and efficacy as a core agonist attribute. An approximate value for agonist efficiency can be calculated from CRC parameters by using Eq. 10, with  $A = 0$  (Fig. 8 A). To make the calculation even easier, Eq. 10 can be rearranged to express  $\eta$  directly in terms of CRC parameters,

$$\frac{1}{\eta} \approx \left( 1 - \frac{n \log(EC_{50})}{\log\left(\frac{I^{\max}}{1-I^{\max}}\right) - \log(I^{\min})} \right), \quad (11)$$

where  $n$  is the number of agonist binding sites and is proportional to  $n_H$  (42). Eq. 11 offers an easy way to estimate approximately an agonist's efficiency from a CRC. If  $I^{\min}$  is not known, it may be possible to compare efficiencies of different agonists by using a common value, for instance  $10^{-6}$ .

We know  $\eta$  is useful because it allows  $EC_{50}$  and  $I^{\max}$  to be estimated from each other. With knowledge of  $\eta$ ,  $EC_{50}$  and an entire CRC can be calculated knowing only the responses at the low- and high-concentration asymptotes (Fig. 8 C). Given  $\eta$  and  $I^{\min}$ , the response at just one agonist concentration, that which produces  $I^{\max}$ , needs to be measured to

estimate  $EC_{50}$ . Having this ability could facilitate drug screening.

It is common practice in CRCs to normalize  $I^{\max}$  to one and lose information regarding agonist efficacy. We have shown that given prior knowledge of  $\eta$  and  $I^{\min}$  and an experimental estimate of  $EC_{50}$ , Eq. 9 can be solved numerically for  $E_2$  and, hence,  $I^{\max}$ . The ability to compute an absolute CRC from a normalized one could be useful once the values of the agonist's efficiency and the receptor's constitutive activity are established. The main caveat is that the calculated efficacy is very sensitive to the value of  $\eta$ .

## SUPPORTING MATERIAL

Supporting material can be found online at <https://doi.org/10.1016/j.bpj.2021.02.034>.

## AUTHOR CONTRIBUTIONS

D.C.I. designed and performed research and analyzed data. A.A. conceptualized and designed research and analyzed data and wrote the manuscript.

## ACKNOWLEDGMENTS

We thank Mary Teeling, Marlene Shero, and Janet Jordan for technical assistance and Pablo M. Paez for allowing access to his IonFlux.

This work was supported by NS-064969 and GM-121463.

## REFERENCES

- Cederholm, J. M., P. R. Schofield, and T. M. Lewis. 2009. Gating mechanisms in Cys-loop receptors. *Eur. Biophys. J.* 39:37–49.
- Gharpure, A., C. M. Noviello, and R. E. Hibbs. 2020. Progress in nicotinic receptor structural biology. *Neuropharmacology.* 171:108086.
- Cetin, H., D. Beeson, ..., R. Webster. 2020. The structure, function, and physiology of the fetal and adult acetylcholine receptor in muscle. *Front. Mol. Neurosci.* 13:581097.
- Grosman, C., M. Zhou, and A. Auerbach. 2000. Mapping the conformational wave of acetylcholine receptor channel gating. *Nature.* 403:773–776.
- Nayak, T. K., and A. Auerbach. 2017. Cyclic activation of endplate acetylcholine receptors. *Proc. Natl. Acad. Sci. USA.* 114:11914–11919.
- Auerbach, A. 2020. Pathways for nicotinic receptor desensitization. *J. Gen. Physiol.* 152:e202012639.
- Rahman, M. M., J. Teng, ..., R. E. Hibbs. 2020. Structure of the native muscle-type nicotinic receptor and inhibition by snake venom toxins. *Neuron.* 106:952–962.e5.
- Purohit, P., and A. Auerbach. 2009. Unliganded gating of acetylcholine receptor channels. *Proc. Natl. Acad. Sci. USA.* 106:115–120.
- Zhou, M., A. G. Engel, and A. Auerbach. 1999. Serum choline activates mutant acetylcholine receptors that cause slow channel congenital myasthenic syndromes. *Proc. Natl. Acad. Sci. USA.* 96:10466–10471.
- Nayak, T. K., R. Vij, ..., A. Auerbach. 2019. Efficiency measures the conversion of agonist binding energy into receptor conformational change. *J. Gen. Physiol.* 151:465–477.
- Sakmann, B., J. Patlak, and E. Neher. 1980. Single acetylcholine-activated channels show burst-kinetics in presence of desensitizing concentrations of agonist. *Nature.* 286:71–73.
- Nicolai, C., and F. Sachs. 2013. Solving ion channel kinetics with the QuB software. *Biophys. Rev. Lett.* 8:191–211.
- Qin, F. 2004. Restoration of single-channel currents using the segmental k-means method based on hidden Markov modeling. *Biophys. J.* 86:1488–1501.
- Qin, F., A. Auerbach, and F. Sachs. 1997. Maximum likelihood estimation of aggregated Markov processes. *Proc. Biol. Sci.* 264:375–383.
- Elenes, S., and A. Auerbach. 2002. Desensitization of diliganded mouse muscle nicotinic acetylcholine receptor channels. *J. Physiol.* 541:367–383.
- Jadey, S. V., P. Purohit, ..., A. Auerbach. 2011. Design and control of acetylcholine receptor conformational change. *Proc. Natl. Acad. Sci. USA.* 108:4328–4333.
- Nayak, T. K., P. G. Purohit, and A. Auerbach. 2012. The intrinsic energy of the gating isomerization of a neuromuscular acetylcholine receptor channel. *J. Gen. Physiol.* 139:349–358.
- Jha, A., P. Purohit, and A. Auerbach. 2009. Energy and structure of the M2 helix in acetylcholine receptor-channel gating. *Biophys. J.* 96:4075–4084.
- Purohit, P., S. Gupta, ..., A. Auerbach. 2013. Functional anatomy of an allosteric protein. *Nat. Commun.* 4:2984.
- Jadey, S., and A. Auerbach. 2012. An integrated catch-and-hold mechanism activates nicotinic acetylcholine receptors. *J. Gen. Physiol.* 140:17–28.
- Jadey, S., P. Purohit, and A. Auerbach. 2013. Action of nicotine and analogs on acetylcholine receptors having mutations of transmitter-binding site residue  $\alpha$ G153. *J. Gen. Physiol.* 141:95–104.
- Yehia, A., and H. Wei. 2020. Studying nicotinic acetylcholine receptors using the IonFlux™ microfluidic-based automated patch-clamp system with continuous perfusion and fast solution exchange. *Curr. Protocols Pharmacol.* 88:e73.
- Vij, R., P. Purohit, and A. Auerbach. 2015. Modal affinities of endplate acetylcholine receptors caused by loop C mutations. *J. Gen. Physiol.* 146:375–386.
- Pettersen, E. F., T. D. Goddard, ..., T. E. Ferrin. 2004. UCSF Chimera—a visualization system for exploratory research and analysis. *J. Comput. Chem.* 25:1605–1612.
- Bruhova, I., and A. Auerbach. 2017. Molecular recognition at cholinergic synapses: acetylcholine versus choline. *J. Physiol.* 595:1253–1261.
- Purohit, Y., and C. Grosman. 2006. Estimating binding affinities of the nicotinic receptor for low-efficacy ligands using mixtures of agonists and two-dimensional concentration-response relationships. *J. Gen. Physiol.* 127:719–735.
- Tripathy, S., W. Zheng, and A. Auerbach. 2019. A single molecular distance predicts agonist binding energy in nicotinic receptors. *J. Gen. Physiol.* 151:452–464.
- Bruhova, I., T. Gregg, and A. Auerbach. 2013. Energy for wild-type acetylcholine receptor channel gating from different choline derivatives. *Biophys. J.* 104:565–574.
- Ling, H. W. 1959. Actions of dimethylphenylpiperazinium. *Br. J. Pharmacol. Chemother.* 14:505–511.
- Purohit, P., I. Bruhova, ..., A. Auerbach. 2014. Catch-and-hold activation of muscle acetylcholine receptors having transmitter binding site mutations. *Biophys. J.* 107:88–99.
- Ohno, K., H. L. Wang, ..., A. G. Engel. 1996. Congenital myasthenic syndrome caused by decreased agonist binding affinity due to a mutation in the acetylcholine receptor epsilon subunit. *Neuron.* 17:157–170.
- Jackson, M. B. 1986. Kinetics of unliganded acetylcholine receptor channel gating. *Biophys. J.* 49:663–672.
- Jha, A., and A. Auerbach. 2010. Acetylcholine receptor channels activated by a single agonist molecule. *Biophys. J.* 98:1840–1846.
- Gupta, S., S. Chakraborty, ..., A. Auerbach. 2017. A mechanism for acetylcholine receptor gating based on structure, coupling, phi, and flip. *J. Gen. Physiol.* 149:85–103.

35. Lape, R., D. Colquhoun, and L. G. Sivilotti. 2008. On the nature of partial agonism in the nicotinic receptor superfamily. *Nature*. 454:722–727.
36. Mukhtasimova, N., W. Y. Lee, ..., S. M. Sine. 2009. Detection and trapping of intermediate states priming nicotinic receptor channel opening. *Nature*. 459:451–454.
37. Auerbach, A. 2005. Gating of acetylcholine receptor channels: brownian motion across a broad transition state. *Proc. Natl. Acad. Sci. USA*. 102:1408–1412.
38. Colquhoun, D. 1998. Binding, gating, affinity and efficacy: the interpretation of structure-activity relationships for agonists and of the effects of mutating receptors. *Br. J. Pharmacol.* 125:924–947.
39. Purohit, P., A. Mitra, and A. Auerbach. 2007. A stepwise mechanism for acetylcholine receptor channel gating. *Nature*. 446:930–933.
40. Sauguet, L., A. Shahsavar, ..., M. Delarue. 2014. Crystal structures of a pentameric ligand-gated ion channel provide a mechanism for activation. *Proc. Natl. Acad. Sci. USA*. 111:966–971.
41. Mukhtasimova, N., C. Free, and S. M. Sine. 2005. Initial coupling of binding to gating mediated by conserved residues in the muscle nicotinic receptor. *J. Gen. Physiol.* 126:23–39.
42. Qin, F. 2010. Hill coefficients of a polymodal Monod-Wyman-Changeux model for ion channel gating. *Biophys. J.* 99:L29–L31.

**Biophysical Journal, Volume 120**

**Supplemental information**

**Agonist efficiency from concentration-response curves: Structural implications and applications**

**Dinesh C. Indurthi and Anthony Auerbach**

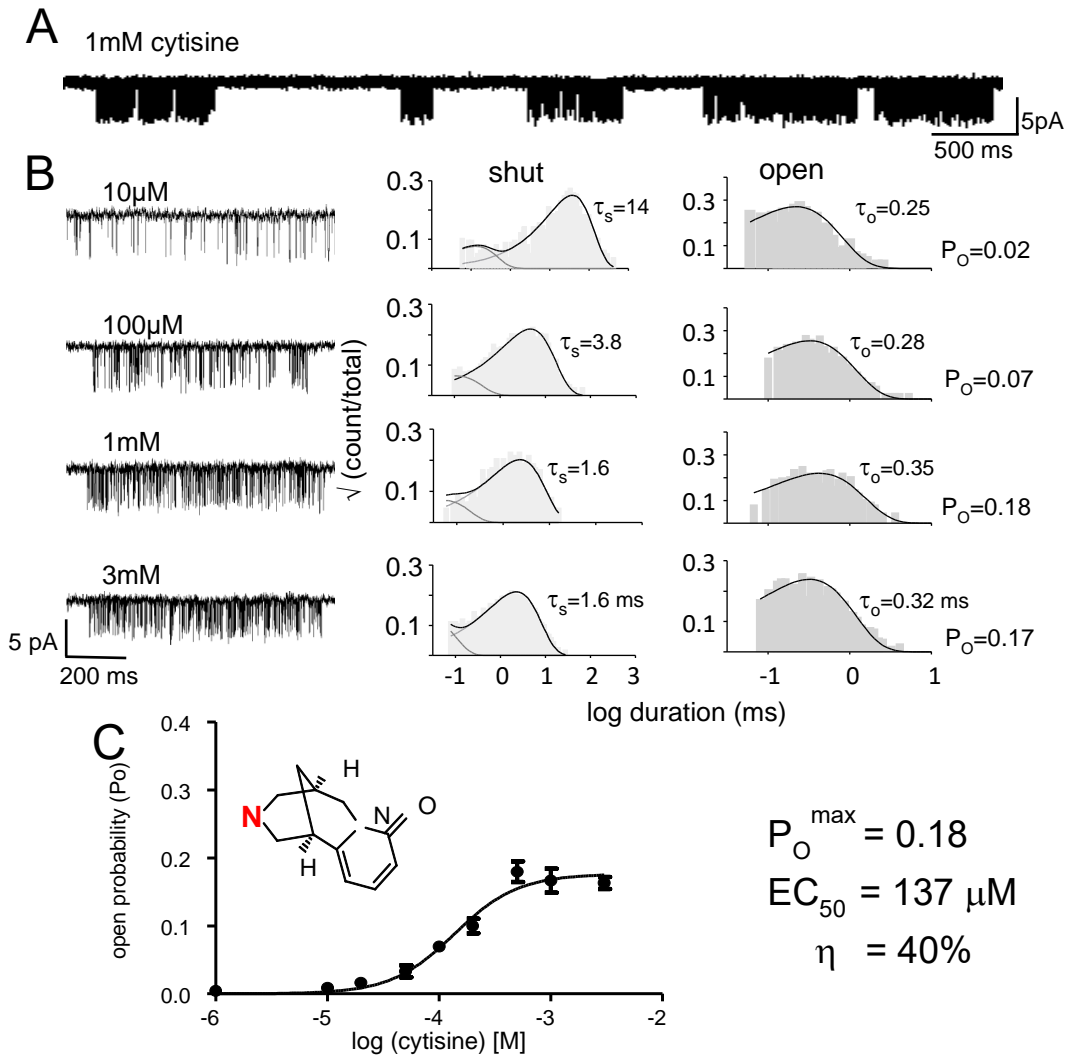

**Figure S1.** Constructing a CRC from single-channel currents (agonist, cytosine). A. Low-resolution view of cell-attached, single-channel currents showing clusters of openings and closing arising from a single AChR separated by long silent periods in which all AChRs in the patch are desensitized (open down). B. High-resolution views of example clusters at different cytosine concentrations and corresponding intra-cluster interval-duration histograms. The predominant shut and open interval durations ( $\tau_s$  and  $\tau_o$ ) were used to calculate an open-channel probability ( $P_o$ ) at each agonist concentration. C. CRC fitted by Eq. 1 to estimate  $EC_{50}$  and  $P_o^{\max}$  (symbols, mean $\pm$ s.e.m.). Efficiency ( $\eta$ ) was calculated by using Eqs. 2-5.



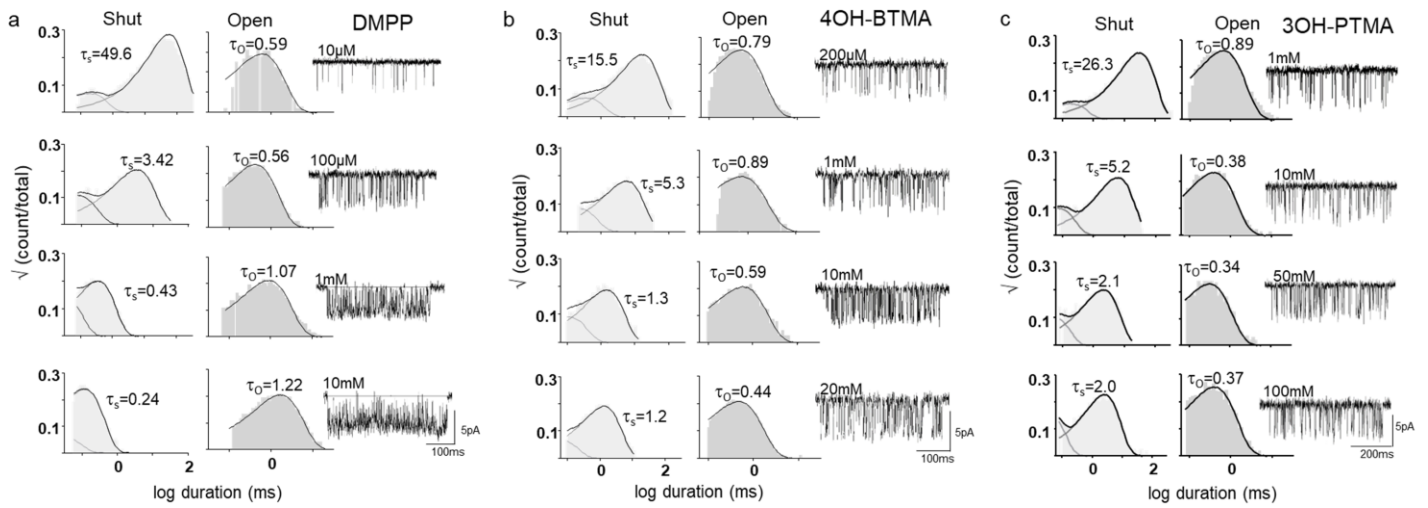

**Figure S2.** Activation of adult-type AChRs by agonists (open in down). Agonist abbreviations in Materials and Methods. Interval-duration histograms and an example cluster. The predominant intra-cluster shut and open interval durations ( $\tau_s$  and  $\tau_o$ ) are in ms. CRCs are shown in Fig. 4A.

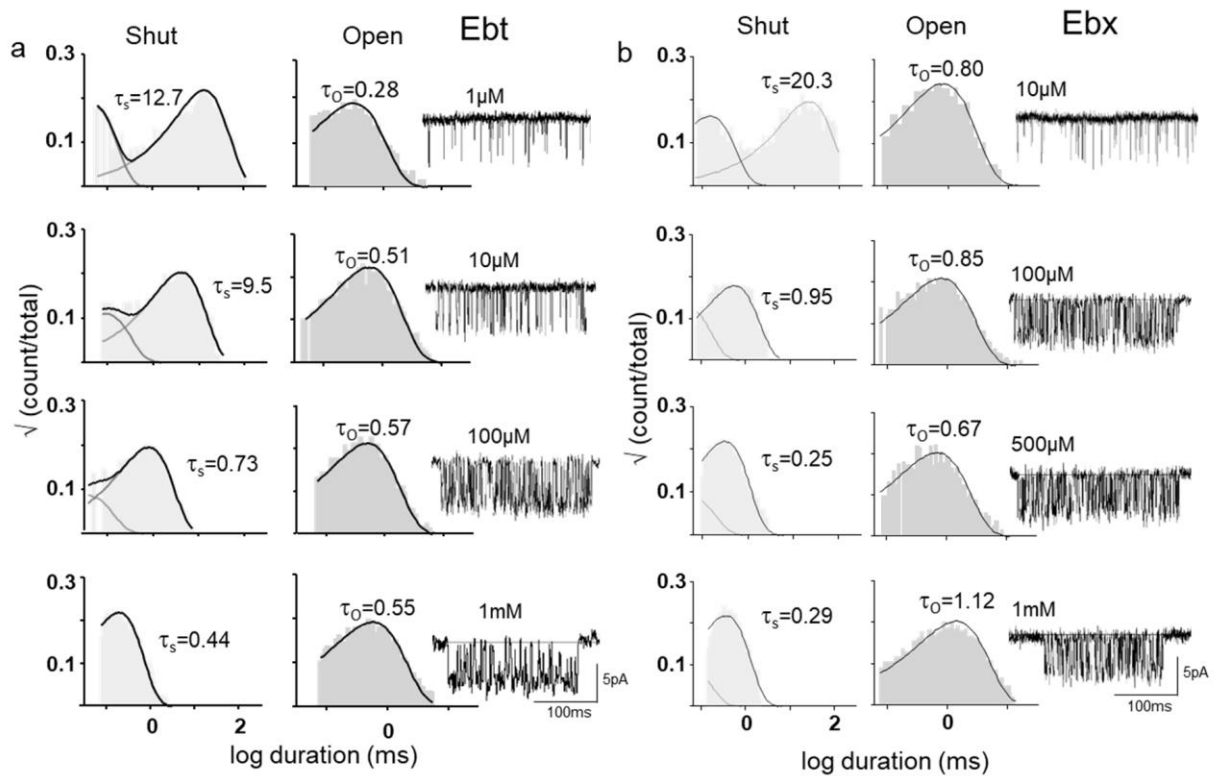

**Figure S3.** Activation of adult-type AChR in the presence of Ebt (epibatidine) and Ebx (epiboxidine). Time constants are ms. CRCs are shown in Fig. 4B.

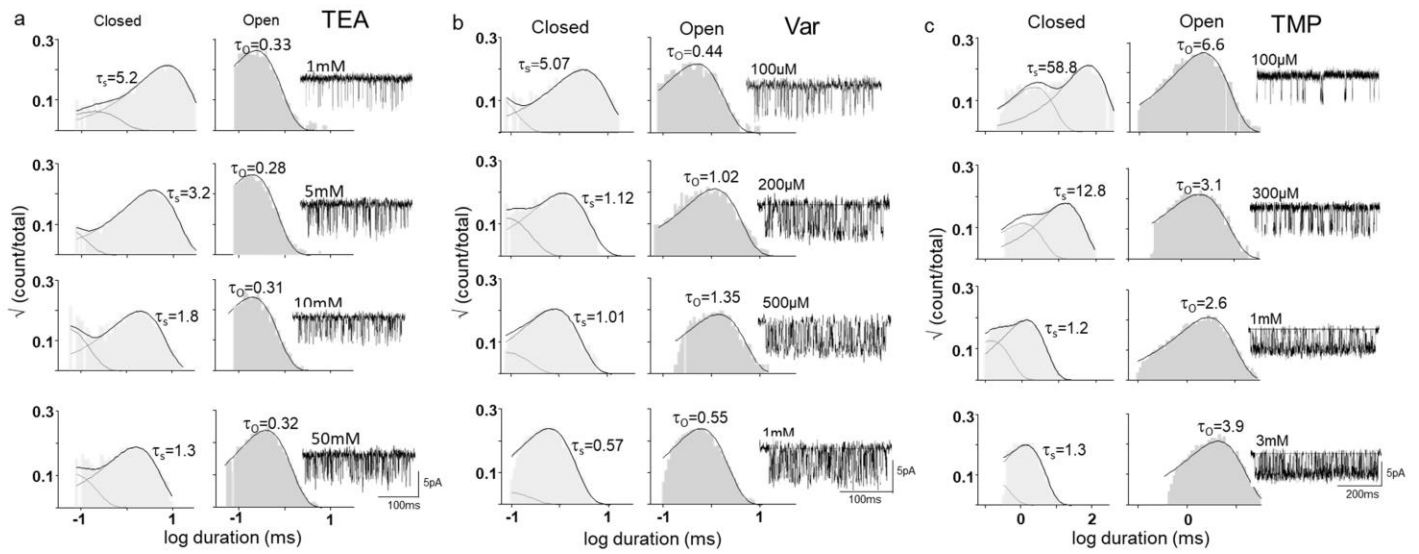

**Figure S4.** Activation of adult-type AChR by TEA (tetraethylammonium), Var (varenicline) and TMP (tetramethylphosphonium). Time constants are ms. CRCs are shown in Fig. 4C.

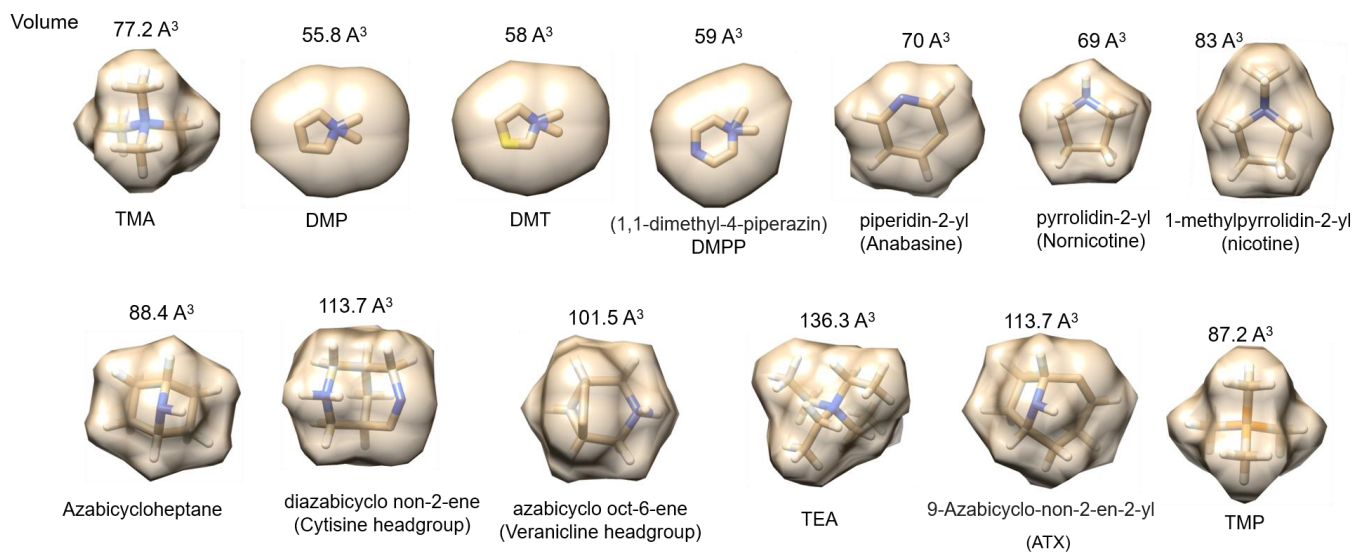

**Figure S5.** Agonist head-group volume. Not shown: the head-groups of ACh, CCh, choline, 3OH-P and 4OH-B are the same as TMA, and those of Ebt and Ebx are the same as azabicycloheptane.

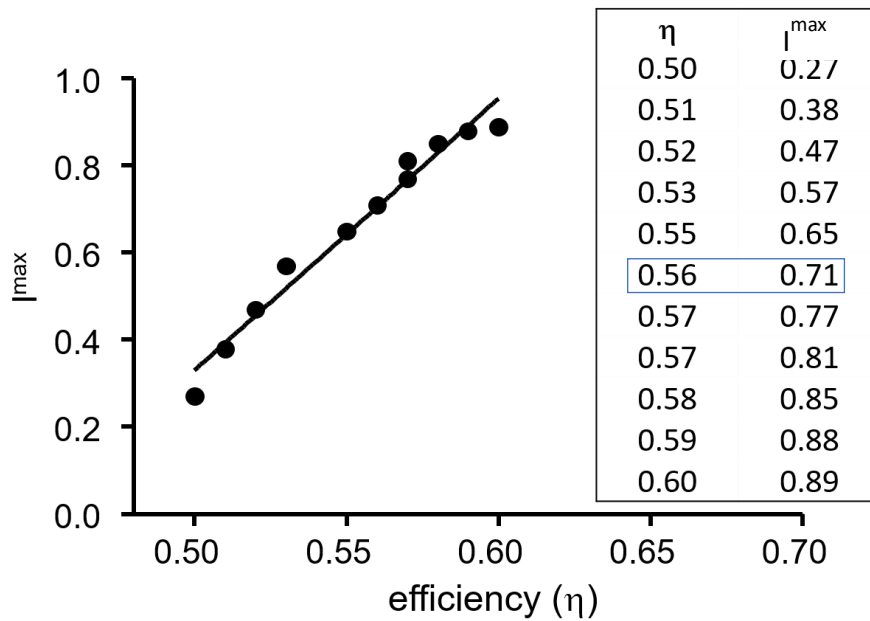

**Figure S6.** Using efficiency ( $\eta$ ) to calculate  $I_{\max}$  from  $EC_{50}$  (from whole cell CRCs normalized to a maximum of 1; Table 2, right) (see Fig. 8B). Agonist, TMA; experimental  $EC_{50}$ , 1.3 mM;  $E_0=5.2 \times 10^{-7}$ . From non-normalized CRCs, the true  $I_{\max}= 0.70$  (Table 2, left).  $I_{\max}$  calculated by using Eq. 9 is very sensitive to  $\eta$ , making it possible to estimate an agonist's efficiency by matching its calculated and experimental (non-normalized) efficacies.

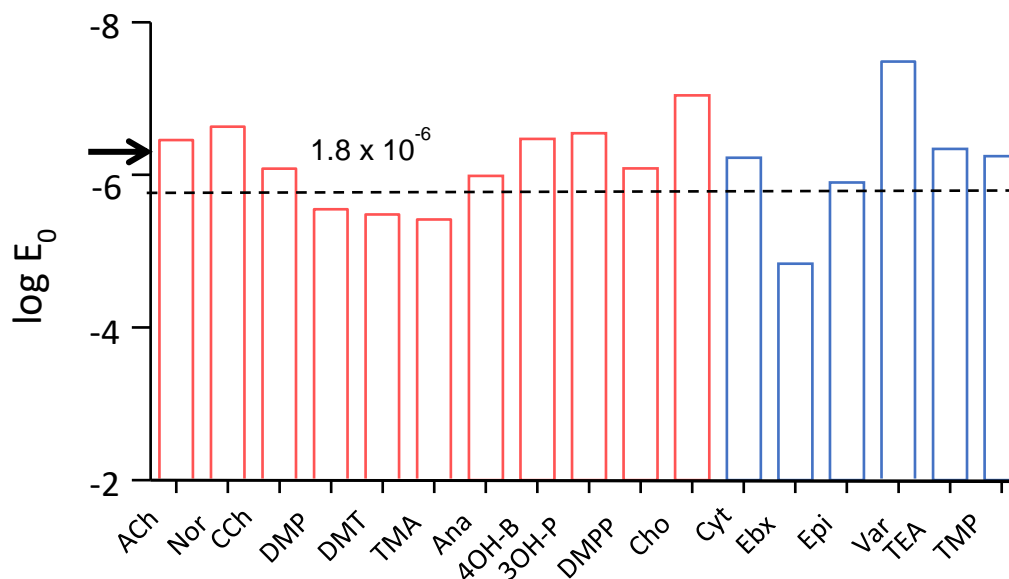

**Figure S7.** Unliganded gating equilibrium constant ( $E_0$ ) estimated from CRC parameters. The assumed  $\eta$  values were either 52% (red) or 41% (blue). The calculated mean  $E_0$  of  $1.8 \times 10^{-6}$  (dashed line) is approximately the same regardless of  $\eta$  and reasonably close to the  $E_0$  value estimated by using other methods,  $7.4 \times 10^{-7}$  (arrow).

**Table S1. ACh efficiency after mutation of a binding site residue (aromatics and  $\epsilon$ P121).**

|                  | $K_{dC}$<br>(mM) | $K_{dO}$<br>( $\mu$ M) | log $K_{dC}$ | log $K_{dO}$ | $\eta$ |
|------------------|------------------|------------------------|--------------|--------------|--------|
| WT               | 0.166            | 0.028                  | -3.78        | -7.55        | 0.50   |
| $\alpha$ Y93W    | 2.01             | 1.20                   | -2.70        | -5.92        | 0.54   |
| H                | 3.20             | 2.90                   | -2.49        | -5.54        | 0.55   |
| A                | 1.21             | 1.30                   | -2.92        | -5.89        | 0.50   |
| F                | 2.59             | 5.80                   | -2.59        | -5.24        | 0.51   |
| S                | 6.24             | 14.0                   | -2.20        | -4.85        | 0.55   |
| $\alpha$ W149Y   | 2.41             | 3.00                   | -2.62        | -5.52        | 0.53   |
| F                | 12.8             | 19.0                   | -1.89        | -4.72        | 0.60   |
| A                | 28.8             | 260.0                  | -1.54        | -3.59        | 0.57   |
| $\alpha$ Y190F   | 3.60             | 16.0                   | -2.44        | -4.80        | 0.49   |
| W                | 6.46             | 56.0                   | -2.19        | -4.25        | 0.48   |
| A                | 16.5             | 1900                   | -1.78        | -2.72        | 0.35   |
| $\alpha$ Y198F   | 0.23             | 0.053                  | -3.64        | -7.28        | 0.50   |
| H                | 5.70             | 9.10                   | -2.24        | -5.04        | 0.55   |
| W                | 0.61             | 0.88                   | -3.21        | -6.06        | 0.47   |
| S                | 3.90             | 12.0                   | -2.41        | -4.92        | 0.51   |
| T                | 9.20             | 38.0                   | -2.04        | -4.42        | 0.54   |
| L                | 4.10             | 21.0                   | -2.39        | -4.68        | 0.49   |
| A                | 7.50             | 41.0                   | -2.12        | -4.39        | 0.52   |
| $\epsilon$ P121L | 0.72             | 2.20                   | -3.14        | -5.66        | 0.44   |
| Y                | 1.27             | 3.00                   | -2.90        | -5.52        | 0.48   |
| G                | 1.00             | 1.20                   | -3.00        | -5.92        | 0.49   |

Equilibrium dissociation constants ( $K_d$ ) of ACh to resting (C) and active (O) conformations of the binding site (Fig. 1) estimated by kinetic modeling (1). Efficiency ( $\eta$ ) is  $1 - \log K_{dC} / \log K_{dO}$ .

**Table S2. Efficiency after mutation os  $\alpha$ G153.**

|               | <b>Ligand</b> | <b>E<sub>2</sub></b> | <b>E<sub>0</sub></b> | <b>K<sub>dC</sub></b> | <b>K<sub>dO</sub></b> | <b>log K<sub>dC</sub></b> | <b>log K<sub>dO</sub></b> | <b><math>\eta</math></b> |
|---------------|---------------|----------------------|----------------------|-----------------------|-----------------------|---------------------------|---------------------------|--------------------------|
| $\alpha$ G153 | Cho           | 0.05                 | 7.4E-07              | 4.0E-03               | 1.5E-05               | -2.40                     | -4.81                     | <b>0.50</b>              |
| S             | Cho           | 0.63                 | 1.9E-05              | 3.7E-04               | 2.0E-06               | -3.43                     | -5.69                     | <b>0.40</b>              |
| A             | Cho           | 1.18                 | 4.2E-05              | 2.9E-04               | 1.7E-06               | -3.54                     | -5.77                     | <b>0.39</b>              |
| P             | Cho           | 1.1                  | 4.8E-05              | 1.5E-04               | 1.0E-06               | -3.81                     | -5.99                     | <b>0.36</b>              |
| K             | Cho           | 3                    | 1.4E-04              | 2.6E-04               | 1.8E-06               | -3.59                     | -5.75                     | <b>0.38</b>              |
| $\alpha$ G153 | DMP           | 0.4                  | 7.4E-07              | 2.1E-03               | 2.9E-06               | -2.68                     | -5.54                     | <b>0.52</b>              |
| S             | DMP           | 6.14                 | 1.9E-05              | 1.8E-04               | 3.2E-07               | -3.74                     | -6.50                     | <b>0.42</b>              |
| A             | DMP           | 12.2                 | 4.2E-05              | 1.9E-04               | 3.6E-07               | -3.71                     | -6.44                     | <b>0.42</b>              |
| P             | DMP           | 13.8                 | 4.8E-05              | 2.0E-04               | 3.8E-07               | -3.69                     | -6.42                     | <b>0.43</b>              |
| K             | DMP           | 20.6                 | 1.4E-04              | 2.3E-04               | 5.9E-07               | -3.64                     | -6.23                     | <b>0.41</b>              |
| $\alpha$ G153 | TMA           | 2.5                  | 7.4E-07              | 8.1E-04               | 4.4E-07               | -3.09                     | -6.36                     | <b>0.51</b>              |
| S             | TMA           | 25.8                 | 1.9E-05              | 8.1E-05               | 7.0E-08               | -4.09                     | -7.16                     | <b>0.43</b>              |
| A             | TMA           | 285                  | 4.2E-05              | 3.9E-05               | 1.5E-08               | -4.41                     | -7.82                     | <b>0.44</b>              |
| P             | TMA           | 179                  | 4.8E-05              | 1.0E-04               | 5.2E-08               | -4.00                     | -7.29                     | <b>0.45</b>              |
| K             | TMA           | 627                  | 1.4E-04              | 1.7E-05               | 8.1E-09               | -4.76                     | -8.09                     | <b>0.41</b>              |
| $\alpha$ G153 | Nicotine      | 0.87                 | 7.4E-07              | 1.0E-03               | 9.2E-07               | -3.00                     | -6.04                     | <b>0.50</b>              |
| S             | Nicotine      | 12.34                | 1.9E-05              | 9.2E-05               | 1.1E-07               | -4.04                     | -6.94                     | <b>0.42</b>              |
| A             | Nicotine      | 17.7                 | 4.2E-05              | 1.1E-04               | 1.8E-07               | -3.94                     | -6.76                     | <b>0.42</b>              |
| P             | Nicotine      | 12.5                 | 4.8E-05              | 3.8E-05               | 7.4E-08               | -4.42                     | -7.13                     | <b>0.38</b>              |
| K             | Nicotine      | 549                  | 1.4E-04              | 1.2E-07               | 6.1E-11               | -6.92                     | -10.22                    | <b>0.32</b>              |
| E             | Nicotine      | 32.05                | 4.5E-05              | 2.6E-05               | 4.0E-09               | -4.59                     | -8.40                     | <b>0.45</b>              |
| R             | Nicotine      | 23.64                | 3.8E-05              | 3.2E-05               | 5.7E-09               | -4.49                     | -8.25                     | <b>0.45</b>              |

Equilibrium dissociation constants ( $K_d$ ) of 4 agonists to resting (C) and active (O) conformations (Fig. 1) estimated by kinetic modeling (2). Efficiency ( $\eta$ ) is  $1 - \log K_{dC} / \log K_{dO}$ .



**Table S3. EC<sub>50</sub> from efficacy given  $\eta$  and E<sub>0</sub> for analogues of choline.**

| Input values          |                |        |                | Calculated values             |                    |                    |                                       |                         |                          |
|-----------------------|----------------|--------|----------------|-------------------------------|--------------------|--------------------|---------------------------------------|-------------------------|--------------------------|
| Ligand                | E <sub>2</sub> | $\eta$ | E <sub>0</sub> | P <sub>0</sub> <sup>max</sup> | log E <sub>0</sub> | log E <sub>2</sub> | log E <sub>2</sub> -logE <sub>0</sub> | K <sub>dC</sub><br>(mM) | EC <sub>50</sub><br>(mM) |
| TMA                   | 2.54           | 0.52   | 5.2E-7         | 0.72                          | -6.28              | 0.40               | 6.69                                  | 0.82                    | 0.49                     |
| ETMA                  | 0.25           | 0.52   | 5.2E-7         | 0.20                          | -6.28              | -0.60              | 5.68                                  | 2.39                    | 2.86                     |
| PTMA                  | 0.29           | 0.52   | 5.2E-7         | 0.22                          | -6.28              | -0.54              | 5.75                                  | 2.61                    | 2.61                     |
| BTMA                  | 2.44           | 0.52   | 5.2E-7         | 0.71                          | -6.28              | 0.39               | 6.67                                  | 0.83                    | 0.51                     |
| Cho                   | 0.05           | 0.52   | 5.2E-7         | 0.05                          | -6.28              | -1.30              | 4.98                                  | 5.01                    | 6.84                     |
| 3OH-PT                | 0.15           | 0.52   | 5.2E-7         | 0.13                          | -6.28              | -0.82              | 5.46                                  | 3.02                    | 3.85                     |
| 4OH-B                 | 0.71           | 0.52   | 5.2E-7         | 0.42                          | -6.28              | -0.15              | 6.14                                  | 1.47                    | 1.42                     |
| Cl Cho                | 0.19           | 0.52   | 5.2E-7         | 0.16                          | -6.28              | -0.72              | 5.56                                  | 2.71                    | 3.37                     |
| 2OH-P                 | 0.02           | 0.52   | 5.2E-7         | 0.02                          | -6.28              | -1.70              | 4.59                                  | 7.65                    | 10.7                     |
| Cholamine<br>(pH 9.0) | 0.04           | 0.52   | 5.2E-7         | 0.04                          | -6.28              | -1.40              | 4.89                                  | 5.56                    | 7.63                     |

Using  $\eta$  and E<sub>0</sub> to calculate EC<sub>50</sub> and K<sub>dC</sub> (Eq. 7) from E<sub>2</sub> (3). TMA (tetramethyl ammonium), ETMA (ethyltrimethyl ammonium), PTMA (propyltrimethyl ammonium), BTMA (butyltrimethyl ammonium), Cho (choline), 3OH-PTMA (3-hydroxypropyl trimethyl ammonium), 4OH-BTMA (4-hydroxybutyl trimethyl ammonium), Cl Cho (2-chloroethyl trimethyl ammonium), 2OH-PTMA (2-hydroxypropyl trimethyl ammonium), cholamine (2-aminoethyl trimethyl ammonium).

**References:**

1. Purohit P, Bruhova I, Gupta S, Auerbach A. Catch-and-Hold Activation of Muscle Acetylcholine Receptors Having Transmitter Binding Site Mutations. *Biophysical Journal*. 2014;107(1):88-99.
2. Jadey S, Purohit P, Auerbach A. Action of nicotine and analogs on acetylcholine receptors having mutations of transmitter-binding site residue alphaG153. *J Gen Physiol*. 2013;141(1):95-104.
3. Bruhova I, Auerbach A. Molecular recognition at cholinergic synapses: acetylcholine versus choline. *J Physiol*. 2017;595(4):1253-61.
